1 **Title:** Differential amplicons for the evaluation of RNA integrity extracted from complex  
2 environmental samples

3

4 **Authors:** Fabien Cholet<sup>#</sup>, Umer Z. Ijaz & Cindy J. Smith

5

6 Infrastructure and Environment Research Division, School of Engineering, University of

7 Glasgow, UK, G12 8LT

8

9

10

11

12

13

14

15 # Address correspondence to [f.cholet.1@research.gla.ac.uk](mailto:f.cholet.1@research.gla.ac.uk)

16

17

18

19

20

21

22

23

24

25

## 26 **Abstract**

## 27 **Background**

28 Reliability and reproducibility of transcriptomics-based studies are highly dependent on the  
29 integrity of RNA. Microfluidics-based techniques based on ribosomal RNA such as the RNA  
30 Integrity Number (RIN) are currently the only approaches to evaluate RNA integrity.  
31 However, it is not known if ribosomal RNA reflects the integrity of the meaningful part of the  
32 sample, the mRNA. Here we test this assumption and present a new integrity index, the Ratio  
33 amplicon,  $R_{amp}$ , to monitor mRNA integrity based on the differential amplification of long to  
34 short RT-Q-PCR amplicons of the glutamine synthetase A (*glnA*) transcript.

## 35 **Results**

36 We successfully designed and tested two  $R_{amp}$  indexes targeting *glnA* transcripts. We showed  
37 in a suite of experimental degradations of RNA extracted from sediment that while the RIN in  
38 general did reflect the degradation status of the RNA well the  $R_{amp}$  mapped mRNA  
39 degradation better as reflected by changes in Reverse Transcriptase Quantitative PCR (RT-Q-  
40 PCR) results. Furthermore, we examined the effect of degradation on transcript community  
41 structure by amplicon sequencing of the *16S rRNA*, *amoA* and *glnA* transcript which was  
42 successful even from the highly-degraded samples. While RNA degradation changed the  
43 community structure of the mRNA profiles, no changes were observed between successively  
44 degraded 16S rRNA transcripts profiles.

## 45 **Conclusion**

46 As demonstrated, transcripts can be quantified and sequenced even from highly degraded  
47 samples. Therefore, we strongly recommend that a quality check of RNA is conducted to  
48 ensure validity of results. For this both the RIN and  $R_{amp}$  are useful, with the  $R_{amp}$  better  
49 evaluating mRNA integrity in this study.

50

51 **Key words:** RNA; mRNA; RNA integrity; RIN; differential amplicons;  $R_{amp}$

52

### 53 **Background**

54 A key question in environmental microbiology is to determine the functioning and activity of  
55 microbial communities. While genomic approaches have resulted in an unprecedented  
56 understanding of their structure and complexity [1], they do not inform of the actual activity  
57 and functioning at a given time. In this case targeting the transcriptome, that is the subset of  
58 genes that are actively transcribed at a given time, is more informative. While there can be  
59 substantial post translational regulation that may prevent final protein synthesis and/or  
60 activity, gene expression is the direct link between the genome and the function it encodes  
61 and therefore is a stronger link to activity than DNA approaches alone [2]. As a result  
62 transcriptomics based approaches are widely used to assess microbial activity and functioning  
63 in the environment [3, 4]. The premise is that that messenger RNA (mRNA) turn-over within  
64 cells is rapid, ranging from a few minutes to less than an hour [5]. As such a snap-shot of the  
65 transcriptome reflects the cells transcriptional response to its surrounding environment and  
66 metabolic needs at a given time.

67 A challenge for all transcript-based studies, not least for those from environmental samples, is  
68 to ensure the quality and integrity of the RNA on which the results are based. Extracted RNA  
69 is prone to degradation both during the extraction procedure, post-extraction handling and  
70 over time. Factors such as RNase activity, physical degradation during extraction procedures,  
71 and even storage can degrade RNA. If there is significant post-extraction degradation among  
72 different samples that are to be compared, the interpretation of results may be compromised.  
73 In other words, differences between samples may arise as a result of post-extraction  
74 degradation, as opposed to representing actual difference in gene expression. Indeed,  
75 meaningful and reproducible results can only be obtained when working with good quality,

76 intact RNA, whether it is eukaryotic RNA [6–9] or Prokaryotic RNA [10]. As such an initial  
77 quality check of extracted RNA, not least from complex environmental microbial  
78 communities should be the essential first step before proceeding to any downstream  
79 applications. This quality check would help to ensure that any differences observed between  
80 samples are due to actual changes in gene expression rather than differences in samples  
81 integrity as a result of degradation.

82 Current methods to evaluate the integrity of extracted RNA are based on ribosomal RNA  
83 (rRNA). These approaches evaluate integrity as a ratio between the 16S and 23S ribosomal  
84 RNA: 16S, 23S and 5S rRNA are synthesized as one primary transcript and are separated  
85 upon maturation [11]. The 16S and 23S ribosome should therefore be present at a ratio 1:1.  
86 However, as the 23S ribosome is approximately twice as large as the 16S ribosome, for intact,  
87 non-degraded RNA, the expected ratio of 23S:16S RNA is 2:1. However, the caveat of this  
88 approach is the assumption that the integrity of rRNA reflects that of the overall RNA,  
89 including mRNA. The relationship between the integrity of rRNA and that of mRNA has not  
90 been demonstrated [6]. Indeed, there are several reports indicating the more stable properties  
91 of rRNA compared to mRNA [12–14]. As such, the usefulness of this ratio to assess mRNA  
92 integrity is still unclear.

93 In its simplest form, evaluating ribosomal RNA integrity is an electrophoretic separation of  
94 RNA in a gel matrix. Essentially, a visual check for the presence of the characteristic bands  
95 corresponding to 16S and 23S rRNA. More advanced techniques based on microfluidics are  
96 better suited for assessing RNA quality, allowing for the calculation of integrity indexes, such  
97 as the RNA Integrity Number, RIN (Agilent Technologies) or the RNA Quality Score, RQI  
98 (BioRad). These scores vary between 0 (RNA totally degraded) and 10 (“perfect” RNA). A  
99 value of 7 has been suggested as a limit between “good” and “bad” quality RNA extracted  
100 from bacterial pure cultures [10]. However, RNA extracted from natural environments such as

101 soil or sediment will likely have lower quality due to the more complex matrixes and, often,  
102 harsh extraction techniques routinely used, such as bead beating [15] but this information is  
103 not widely reported in the literature. Nevertheless, as highlighted above, even if reported, a  
104 shortcoming for RIN/RQI algorithms is that they are primarily based on rRNA (16S/23S  
105 ratio) which may degrade differently from mRNAs; the relevance of such indexes for gene  
106 expression analysis is therefore unknown.

107 In Eukaryotic gene expression studies, an alternative index often used to evaluate the  
108 level of mRNA degradation is the 3'-5' ratio [16]. This technique is based on the observation  
109 that Eukaryotic mRNAs generally degrade from the 5' to the 3' end, with the 3' poly A tail  
110 acting as a protective agent. As a result, Reverse Transcriptase-PCR (RT-PCR) targeting the  
111 5' end of the transcript is less likely to be produce amplicons than those targeting the 3' end.  
112 A high 3':5' ratio (low 5' copy number) is therefore an indication of mRNA degradation. This  
113 technique cannot be applied to prokaryotic mRNAs as they generally don't possess poly A  
114 tails, and when they do, the tail enhances mRNA degradation [17]. Recently, a new approach  
115 called differential amplicon ( $\Delta$ amp) has been developed [18]. This technique is based on the  
116 differential amplification of RT-PCR amplicons of different lengths from the same mRNA  
117 target as a new means to determining RNA integrity (see also [19]). Here it was observed that  
118 the copy number of long RT-Q-PCR targets correlated with mRNA degradation whereas the  
119 short targets were more stable. Since this approach doesn't rely on the presence of the poly A  
120 tail, it could theoretically be adapted to prokaryotic mRNAs. Although this has not been  
121 directly observed for prokaryote RNA, Reck *et al* [20] showed a similar response of a  
122 exogenous green-fluorescent-protein mRNA(GFP) that they spiked into stool RNA to monitor  
123 its integrity when subjected to different storage conditions. They showed that the copy  
124 number of the spiked exogenous GFP correlated well with RNA integrity when targeting a  
125 long amplicon ( $\geq 500$ bp), whereas the short amplicon ( $\leq 100$ bp) remained constant, even in

126 highly degraded RNA preparations. This indicated that, as was observed by Björkman and co-  
127 workers, longer mRNA targets reflect degradation better. As such, the difference in RT-Q-  
128 PCR performance, reflected by the difference in cycle threshold (Ct) between a short and a  
129 long amplicon from the same cDNA target could be used as an index to reflect mRNA  
130 integrity.

131 Here, we propose to exploit the differential amplicon approach to develop a ratio of  
132 long to short amplicons directly targeting mRNA transcripts of the same target but of  
133 differing lengths by RT-Q-PCR as an indicator of overall mRNA integrity. For this we  
134 propose the ubiquitous bacterial glutamine synthetase A transcript (*glnA*) as the target.  
135 Glutamine synthetase is a ubiquitous gene, found in Bacteria and Archaea [21, 22], with a role  
136 in assimilating inorganic nitrogen (ammonia) into amino acids [23]. The *glnA* transcript has  
137 been used previously in RT-(Q)-PCR approaches to evaluate RNA extraction yield from soils  
138 [24–26]. However, as the expression of *glnA* is regulated by ammonia concentration [27–29],  
139 the copy number of this transcript can vary making comparison between studies difficult. Our  
140 approach overcomes this difficulty by calculating the ratio of long to short *glnA* transcripts.  
141 We designate this the Ratio Amplicon ( $R_{amp}$ ), and propose it as an indicator of mRNA  
142 integrity, independent of absolute gene expression.

143 Specifically, this study aims to design and test the Ratio Amplicon ( $R_{amp}$ ) approach to  
144 evaluate bacterial mRNA integrity extracted from marine sediments. Furthermore, we aim to  
145 compare and evaluate this approach against the conventional ribosomal based RNA integrity  
146 index, RIN. Comparison between the two approaches was conducted by monitoring how well  
147 both indexes reflected experimental RNA degradation (UV, heat, RNase, freeze/thaw). The  
148 impact of RNA degradation and the ability of the two indexes to predict ribosomal and  
149 mRNA integrity was evaluated via quantification of two commonly surveyed bacterial  
150 transcripts, the highly abundant ribosomal 16S rRNA and mRNA from the less abundant

151 bacterial ammonia monooxygenase (*amoA*). Finally, the effect of RNA degradation on  
152 transcript community structure was evaluated by amplicon sequencing of the cDNA obtained  
153 from sequentially degraded samples.

154 We hypothesised that i) the  $R_{amp}$  would be a better predictor of mRNA integrity than the RIN  
155 and ii) RNA degradation would adversely affect both transcript quantification and community  
156 composition.

157

## 158 **Methods**

### 159 **Sediment Samples**

160 Surface mud samples (0 to 2 cm) were collected on 11/01/2017 from Rusheen Bay, Ireland  
161 (53.2589° N, 9.1203° W) (presence of *amoA* genes/transcripts previously established [30, 31]  
162 in sterile 50ml Eppendorf tubes, flash frozen and stored at -80°C until subsequent use.

163

### 164 **Design of new *glnA* primers**

165 To design new primers, bacterial *glnA* sequences were downloaded from the GeneBank  
166 database [32]. Sequences related to environmental bacteria were subjected to BLAST search  
167 [33] in order to gather additional sequences. In total eighty-four sequences (Additional file 1)  
168 were aligned using MUSCLE [34] and a phylogenetic neighbour joining tree was drawn in  
169 MEGA 7 [35]. Based on sequence similarity, eight groups could be distinguished (see  
170 Additional file 4: Figure S1). Primer sequences from Hurt and co-workers [15] were aligned  
171 in each individual group to determine coverage and new primers (Table 1) were designed  
172 based on conserved regions to target the same groups with varying length primers.

173 Primers were tested on DNA and cDNA using environmental DNA/RNA extractions and  
174 environmental cDNA, as template. *glnA* genes were amplified (BIOTAQ DNA polymerase  
175 kit; Bioline) in a 25µl final volume composed of 2.5µl BioTaq10x buffer, 18µl water, 1.5µl

176 MgCl<sub>2</sub> (50mM), 0.5µl of each primer (10µM), 0.5µl dNTPs (10µM each), 0.5µl *Taq* DNA  
177 polymerase and 1µl of template. PCR conditions were as follow: 95°C 5 min, (94°C 30 sec,  
178 60°C 30 sec, 72°C 30 sec) x 30 and 72°C 5 min.

179

### 180 **RNA preparation from sediment**

181 All surfaces and equipment were cleaned with 70% ethanol and RNase Zap (Ambion) before  
182 sample processing. All glassware and stirrers used for solutions preparation were baked at  
183 180°C overnight to inactivate RNases. All plasticware was soaked overnight in RNase away  
184 (ThermoFisher Scientific) solution. Consumables used, including tubes and pipet tips were  
185 RNase free. All solutions were prepared using Diethylpyrocarbonate (DEPC) treated Milli-Q  
186 water. A simultaneous DNA/RNA extraction method, based on that of Griffiths and co-  
187 workers [36] was used to recover nucleic acids from sediment. Briefly, 0.5g of sediments  
188 were extracted from using bead beating lysing tubes (Matrix tube E; MP Biomedical) and  
189 homogenised in 0.5ml CTAB/phosphate buffer (composition for 120 ml: 2.58g  
190 K<sub>2</sub>HPO<sub>4</sub>·3H<sub>2</sub>O; 0.10g KH<sub>2</sub>PO<sub>4</sub>; 5.0g CTAB; 2.05g NaCl) plus 0.5ml  
191 Phenol:Chlorophorm:Isoamyl alcohol (25:24:1 v:v:v). Lysis was carried out on a FastPrep  
192 system (MP Biomedical) (S: 6.0; 40sec) followed by a centrifugation at 12,000g for 20min  
193 (4°C). The top aqueous layer was transferred in a fresh 1.5ml tube and mixed with 0.5ml  
194 chlorophorm:isoamyl alcohol (24:1 v:v). The mixture was centrifuged at 16,000g for 5min  
195 (4°C) and the top aqueous layer was transferred in a new 1.5ml tube. Nucleic acids were  
196 precipitated by adding two volumes of a solution containing 30% poly(etlyleneglycol)<sub>6000</sub>  
197 (PEG6000) and 1.6M NaCl for 2 hours on ice and recovered by centrifugation at 16,000 x g  
198 for 30 min (4°C). The pellet was washed with 1ml ice-cold 70% ethanol and centrifuged at  
199 16,000g for 30 min (4°C). Ethanol wash was discarded and the pellet was air dried. Once the



200 ethanol was completely evaporated, the pellet was re-suspended in DEPC treated water.  
201 DNA/RNA preparations were stored at -80°C if not used immediately.  
202 RNA was prepared from the DNA/RNA co-extraction by DNase treating with Turbo DNase  
203 Kit (Ambion) using the extended protocol: half the recommended DNase volume is added to  
204 the sample and incubated for 30min at 37°C, afterwhich the second half of DNase is then  
205 added and the sample is re-incubated at 37°C for 1 hour. Success of the DNase treatment was  
206 checked by no PCR amplification of the V1-V3 Bacterial *16S rRNA* gene [4].

207

## 208 **RNA degradation experiments**

### 209 Physical degradation

210 To obtain RNA with controlled degradation status, DNA free RNA preparations ( $\approx 8\mu\text{l}$ ) were  
211 aliquoted from an initial extraction in separate 0.2ml RNase free tubes and incubated at 90°C  
212 or under a UV lamp for 0, 10, 45 or 90 minutes. To determine the potential effect of repeated  
213 freeze-thaw on RNA preparations, the same 15 $\mu\text{l}$  DNA-free RNA was exposed to cycles of  
214 freezing (at -80°) and thawing (on ice) as follows - 0, 1, 3, 5, 7 and 10 freeze-thaw cycles.  
215 cDNA was then generated for each individual aliquot as described later.

216

### 217 Enzymatic Degradation by RNase I

218 For RNase I degradation experiment, 40 $\mu\text{l}$  aliquots of DNA-free RNA was incubated at 37°C  
219 for 40min in the presence of increasing concentrations of RNaseI (supplier): 0 (buffer only),  
220 2, 10, 20 and 40 Units RNase I/  $\mu\text{g}$  RNA. The reaction was stopped by adding 10 $\mu\text{l}$   $\beta$ -  
221 mercaptoethanol and RNA was recovered by ethanol precipitation: 5 $\mu\text{l}$  of 7.5M ammonium  
222 acetate and 137.5 $\mu\text{l}$  100% ethanol was added and the mixture was precipitated overnight at -  
223 20°C. RNA was pelleted by centrifugation 16,000 x g for 40min at 4°C and the pellet was  
224 washed with 480 $\mu\text{l}$  ice cold 70% ethanol and pelleted by centrifugation at 16,000g for 30min

225 at 4°C. The pellet was air dried and re-suspended in 40µl of DEPC-treated water. An aliquot  
226 of RNA that did not undergo ethanol precipitation was also included for comparison  
227 (designated NT: “Not Treated”).

228

### 229 **Reverse Transcriptase Reaction**

230 DNA-free RNA was used for *glnA* cDNA synthesis using Superscript III kit (Invitrogen) and  
231 gene specific priming. The initial RT mixture containing 3µl water, 1µl reverse primer  
232 GS1\_new (10µM), 1µl dNTP’s (10mM each) and 5µl template was incubated at 65°C for 5  
233 min and quickly transferred on ice for 1 min. A second mix composed of 4 µl 5X first-strand  
234 buffer, 1 µl 0.1 mM dithiothreitol (DTT), and 1µl SuperScript III (200 units/µl) was added  
235 and the resulting mixture was incubated at 55°C for 50 min and then at 72°C for 15 min. The  
236 primers and PCR conditions for the amplification of *glnA* targets from cDNA were similar to  
237 those used for DNA.

238 For *16S rRNA* and *amoA* genes, Superscript III kit (Invitrogen) and random hexamers priming  
239 was used. The initial RT mixture containing 3µl water, 1µl random hexamer (50µM), 1µl  
240 dNTP’s (10mM each) and 5µl template was incubated at 65°C for 5 min and quickly  
241 transferred to ice for 1 min. A second mix composed of 4 µl 5X first-strand buffer, 1 µl 0.1  
242 mM dithiothreitol (DTT), and 1µl SuperScript III (200 units/µl) and 1µl RNase inhibitor  
243 (40U/µl) was added and the resulting mixture was incubated at 25°C for 5 min, 55°C for 50  
244 min and then at 72°C for 15 min.

245

### 246 **RNA integrity evaluation**

247 *RNA integrity number*

248 RINs were determined at all degradation points, using the automated 2100 Bioanalyser  
249 platform (Agilent Technologies) with the Prokaryote total RNA Nano chip, following the  
250 manufacturer's instructions.

251

### 252 *glnA* Q-PCR and Ratio amp ( $R_{amp}$ ) calculation

253 *glnA* cDNA underwent Q-PCR, to amplify varying length amplicon fragments with primer  
254 combination as detailed in table 1). Three *glnA* amplicons were produced (Fig. 1), a 120bp  
255 amplicon (amplicon 1) generated using the primer pair GS1\_new/GSFw1200, a 170bp  
256 amplicon (amplicon 2) generated using the primer pair GS1\_new/GS2\_new and a 380bp  
257 amplicon (amplicon 3) generated using the primer pair GS1\_new/GSFw900. Q-PCR reaction  
258 (10 $\mu$ l) was composed of 5 $\mu$ l EVAGreen Supermixes (SsoFast; Bio-Rad), 0.3 $\mu$ l of each  
259 primers (10 $\mu$ M) and 1 $\mu$ l of cDNA template (1/10 diluted). The Q-PCR condition was as  
260 follows: 95°C-30sec, (95°C-10sec; 65°C-10 sec) x 35 cycles; plate read at 65°C. Melt curve  
261 analysis was performed from 65°C to 95°C with 0.5°C increment every 5 sec.

262 The Ct value of each assay was recorded and the differential amplicon ratios ( $R_{amp}$ ) were  
263 calculated for each degradation point as follows:

$$264 R_{amp} = \frac{35 - Ct(\text{long amplicon})}{35 - Ct(\text{short amplicon})}$$

265 The value of 35 was chosen as the maximum number of Q-PCR cycles the reaction  
266 underwent. A transformation of the differential amplicon was applied in order to have a  
267 theoretical maximal value of 1 (no degradation of RNA) and a theoretical minimal value close  
268 to 0 (totally degraded RNA).

269

### 270 ***amoA* and 16S rRNA RT-Q-PCR**

271 For all degradation experiments, the Cts of the Bacterial *amoA* and the Bacterial 16S rRNA  
272 was determined by Q-PCR of the cDNA preparations. The *amoA* Q-PCR was carried out in a

273 20µl reaction volume composed of 10µl 5µl EVAGreen Supermixes (SsoFast; Bio-Rad),  
274 0.4µl of each primer (BacamoA-1F and BacamoA-2R) (10µM each), 7.2µl water and 2µl of  
275 cDNA template (1/10 diluted). The Q-PCR cycle was as follows: 95°C-5 min, (95°C-30sec,  
276 47°C-30 sec, 72°C-1min, 81°C-1sec → plate read) x 40 cycles. Melt curve analysis was  
277 performed from 65°C to 95°C with 0.5°C increment every 5 sec. *16S rRNA* cDNA targets  
278 were quantified in a 20µl reaction volume composed of 10µl Itaq Universal Probes Supermix  
279 (Bio-Rad), 1.8µl each primer (1369F and 1492r) (10µM each), 0.4µl probe (1389P) (10µM),  
280 5µl water and 1µl cDNA template (1/10 diluted). The Q-PCR cycle was as follows: 95°C-  
281 10min, (95°C-10sec, 60°C-30sec) x 40 cycles and 40°C-10min. All primers are detailed in  
282 table 1.

283

#### 284 **Illumina sequencing**

285 The qualitative effect of RNA degradation the community composition of the three bacterial  
286 genes (*amoA*, *glnA* and 16S rRNA) was determined by sequencing the amplicons generated  
287 from the cDNA preparations obtained after RNase I degradation. For each PCR amplification  
288 was carried out using the HotStartTaq PCR kit (Qiagen) in the following mix 25µl volume:  
289 19.8µl water, 0.5µl of each primer (10µM each), 0.5µl dNTPs (10µM each), 0.2µl  
290 HotStartTaq, 2.5µl of 10x PCR buffer and 1µl cDNA template (10<sup>-1</sup> and 10<sup>-3</sup> diluted for  
291 functional genes and 16S rRNA respectively). Primers used for sequencing are listed in table  
292 1 (Illumina adaptors were added at the 5' end of the sequencing primers for PCR: 5'-TCG  
293 TCG GCA GCG TCA GAT GTG TAT AAG AGA CAG (forward adaptor); 5'-GTC TCG  
294 TGG GCT CGG AGA TGT GTA TAA GAG ACA G (reverse adaptor). The PCR cycles  
295 were as follows: *amoA*: 95°C-15min, (94°C-30sec, 55°C-30sec, 72°C-30sec) x 32 cycles and  
296 72°C-10min final extension; *glnA*: 95°C-15min, (94°C-30sec, 55.6°C-40sec, 72°C-40sec) x  
297 32 cycles and 72°C-7min final extension; 16S rRNA: 95°C-15min, (94°C-45sec, 50°C-30sec,

298 72°C-40sec) x 25 cycles and 72°C-10min final extension. For each functional gene, three  
299 separate PCRs were carried out, using the same conditions, and pooled together for further  
300 processing.

301 PCR amplicons were cleaned using the AMPure XP beads kit following the manufacturer's  
302 recommendations. Illumina indexes were then attached using the Nextera XT Index Kit with  
303 the following PCR condition: 95°C-15min, (95°C-30sec, 55°C-30sec, 72°C-30sec) x 8 cycles  
304 and 72°C-5min. The resulting amplicons were purified using the AMPure XP beads kit and  
305 eluted in 25µl water. After this step, some preparations were randomly chosen (2 per genes)  
306 and run on the Bioanalyser following the DNA 1000 Assay protocol (Agilent Technologies)  
307 to determine the average length of the amplicons and to check for the presence of unspecific  
308 products. Finally, DNA concentration was determined using fluorometric quantification  
309 method (Qubit) and molarity was calculated using the following equation:

310  $(\text{concentration in ng}/\mu\text{l}) \times 10^6 = (660 \text{ g/mol} \times \text{average library size}).$

311 Libraries were pooled in equimolar amount, and checked again on the Bioanalyser and the  
312 final library was sent to the Earlham Institute (Norwich Research Park, Norwich, UK) for  
313 Illumina MiSeq amplicon sequencing.

314

## 315 **Bioinformatics**

### 316 Construction of the reference databases

317 The following sequences were downloaded (see Additional file 2): *amoA* sequences from  
318 Fungene (<http://fungene.cme.msu.edu/>) alongside NCBI sequences (n=642); and bacterial  
319 *glnA* sequences (n=1330) as FASTA files from Microbial Genome Database  
320 (<http://mbgd.genome.ad.jp>). For *amoA* sequences, the NCBI taxonomy was given in the  
321 FASTA headers whereas for *glnA* sequences, the MBGD Archive  
322 ([http://mbgd.genome.ad.jp/htbin/view\\_arch.cgi](http://mbgd.genome.ad.jp/htbin/view_arch.cgi)) was used to download annotations

323 (mbgd\_2016\_01) associated with the sequences, and a custom script was written to identify  
324 and tag the sequences with NCBI taxonomy. Subsequently, R's rentrez [37] package was used  
325 to get taxonomic information at different levels to generate a taxonomy file for *glnA*  
326 sequences. The FASTA file and the corresponding taxonomy file was then formatted to work  
327 with Qiime. For *16S rRNA* we used the SILVA SSU Ref NR database release v123.

328

### 329 Processing of amplicon sequences

330 Abundance tables were obtained by constructing operational taxonomic units (OTUs) as  
331 follows. Paired-end reads were trimmed and filtered using Sickle v1.200 [38] by applying a  
332 sliding window approach and trimming regions where the average base quality drops below  
333 20. Following this we apply a 10 bp length threshold to discard reads that fall below this  
334 length. We then used BayesHammer [39] from the Spades v2.5.0 assembler to error correct  
335 the paired-end reads followed by pandaseq v(2.4) with a minimum overlap of 20 bp to  
336 assemble the forward and reverse reads into a single sequence. The above choice of software  
337 was as a result of author's recent work [40, 41] where it was shown that the above strategy of  
338 read trimming followed by error correction and overlapping reads reduces the substitution  
339 rates significantly. After having obtained the consensus sequences from each sample, the  
340 VSEARCH (v2.3.4) pipeline (all these steps are documented in  
341 <https://github.com/torognes/vsearch/wiki/VSEARCH-pipeline>) was used for OTU  
342 construction. The approach is as follows: the reads are pooled from different samples  
343 together and barcodes added to keep an account of the samples these reads originate from.  
344 Reads are then de-replicated and sorted by decreasing abundance and singletons discarded. In  
345 the next step, the reads are clustered based on 97% similarity, followed by removing clusters  
346 that have chimeric models built from more abundant reads (--uchime\_denovo option in  
347 vsearch). A few chimeras may be missed, especially if they have parents that are absent from

348 the reads or are present with very low abundance. Therefore, in the next step, we use a  
349 reference-based chimera filtering step (--uchime\_ref option in vsearch) using a gold  
350 database ([https://www.mothur.org/w/images/f/fl/Silva\\_gold\\_bacteria.zip](https://www.mothur.org/w/images/f/fl/Silva_gold_bacteria.zip)) for 16S rRNA  
351 sequences, and the above created reference databases for *glnA* and *amoA* genes. The original  
352 barcoded reads were matched against clean OTUs with 97% similarity to generate OTU tables  
353 (4108, 1691, and 55 OTU sequences for 16SrRNA, *glnA* and *amoA* respectively). The  
354 representative OTUs were then taxonomically classified using assign\_taxonomy.py script  
355 from Qiime [42] against the reference databases. To find the phylogenetic distances between  
356 OTUs, we first multi sequence aligned the OTUs against each other using Mafft [43] and then  
357 used FastTree v2.1.7 [44] to generate the phylogenetic tree in NEWICK format. Finally,  
358 make\_otu\_table.py from Qiime workflow was employed to combine abundance table with  
359 taxonomy information to generate biome file for OTUs.

360

### 361 **Statistical analysis**

362 All statistical analyses were carried out in R. For degradation experiments RIN and  $R_{amp}$   
363 values were compared between time points with one-way ANOVA, when the ANOVA test  
364 was significant, differences between time points were investigated using Tuckey HSD post-  
365 hoc test. For community analysis (including alpha and beta diversity analyses) we have used  
366 the vegan package [45]. To find OTUs that are significantly different between multiple  
367 conditions (Degradation), DESeqDataSetFromMatrix() function from DESeq2 [46] package  
368 with the adjusted p-value significance cut-off of 0.05 and log2 fold change cut-off of 2 was  
369 used. Vegan's adonis() was used for analysis of variance (henceforth referred to as  
370 PERMANOVA) using distance matrices (BrayCurtis/Unweighted Unifrac/Weighted Unifrac  
371 for gene sequences) i.e., partitioning distance matrices among sources of variation

372 (Degradation). The scripts for above analysis can be found at  
373 <http://userweb.eng.gla.ac.uk/umer.ijaz/#bioinformatics>

374

## 375 **Results**

### 376 **Design and optimization of *glnA* primers**

377 Three new forward *glnA* primers (GSFw1200, GSFw900 and GSFw800) were designed to  
378 target a conserved region in groups 3, 4, 5, 7 and 8 of the *glnA* alignment (Additional file 4:  
379 Figure S1) at a position  $\approx 120$  bp,  $\approx 380$ bp and  $\approx 500$ bp, respectively, in front (closer to the 5'  
380 end of the gene) of an updated reverse primer from Hurt and co-workers named, GS1\_new  
381 primer. This resulted in three amplicon sizes to derive a ratio amplicon ( $R_{amp}$ ) from (Fig. 1).  
382 The newly designed primers (Table 1) were optimised for PCR and RT-PCR resulting in  
383 amplicons of the expected size for all primer pairs. Assays were subsequently optimised for  
384 SYBR Green Q-PCR. All primers except for GSFw800, producing the 500 bp amplicon were  
385 successfully optimised with diagnostic single peak melt curves. As such we proceeded with  
386 two  $R_{amp}$  ratio primer sets the  $R_{amp}$  380/120 and the  $R_{amp}$  380/170.

387

### 388 **Heat degradation**

389 Incubation of RNA at 90°C had a strong and rapid impact on its integrity with a drop in the  
390 RIN from 7.5 to 4.7 after 10min. At this point, the band corresponding to 23S rRNA had  
391 almost completely disappeared. Further exposure resulted in more pronounced degradation  
392 with accumulation of short RNA fragments and a RIN around 2 for both 45min and 90min  
393 exposure (Fig. 2A & 1A). One-way ANOVA revealed significant difference between all time-  
394 points, except 45 and 90min. A low and non-significant decrease in both  $R_{amp}$  indexes was  
395 observed (-0.07 for 380/120 and -0.11 for 380/170) between 0min and 10min (Fig. 2C). This  
396 would tend to indicate that the  $R_{amp}$  was less sensitive than the RIN for monitoring RNA



397 degradation by heat. However, interestingly the increase in Ct was also not significant for  
398 both *amoA* and *16S rRNA* between 0 and 10min (Fig. 2B), showing that the  $R_{amp}$  reflected the  
399 outcome of the RT-Q-PCR assays better than the RIN. Further exposure to heat induced a  
400 more pronounced decrease in both  $R_{amp}$  ( $\approx -0.4$  for 380/120 and  $\approx -0.3$  for 380/170) at 45min  
401 compared to 0min. Both  $R_{amp}$  indexes reached values around 0.15 at 90min, which mapped  
402 well the behaviour of *amoA*, with a sharp increase in the Ct for this transcript between 10 and  
403 45min ( $\approx 4$ cts) and between 45 and 90min (another  $\approx 4$ cts). The 16S rRNA transcript was also  
404 affected but to a smaller extent (increase in Ct of only  $\approx 3$ ct between 0 and 90min). Yet, in this  
405 case too, the increase was quite low between 0 and 10min and sharper between 10-45min and  
406 45-90min.

407

#### 408 **UV degradation**

409 The RIN was almost insensitive to UV radiation with an overall decrease of  $\approx 1$  at 90min  
410 compared to 0min (Fig. 3A & 3C). In contrast, UV radiation had a more pronounced effect  
411 on transcript quantification than heat as reflected by a quasi linear increase in Ct of the *amoA*  
412 transcript between 0 and 45min (Fig. 3B). Unlike heat exposure, 10min under UV induced  
413 strong and significant increase in *amoA* Ct values ( $\approx 4$ cts). At 45min, the Ct had increased by  
414  $\approx 9$  compared to the starting point. After 90min, the Ct of the *amoA* transcript almost reached  
415 35, close to the detection limit. The Ct for *16S rRNA* transcript increased steadily from 18 at  
416 0min to 20 at 90min, showing that this assay/transcript was less sensitive to UV degradation.  
417 The behaviour of the  $R_{amp}$ , again, mapped well onto *amoA* behaviour with a decrease of  $\approx 0.2$   
418 after 10min exposure for both indexes (though this was not significant) (Fig. 3C). A net  
419 decrease was observed at 45min ( $\approx -0.6$  compared to 0min) and at 90min both  $R_{amp}$  almost  
420 reached 0 since the Ct of the amplicon 3 *glnA* (380bp) was very close to 35.

421

## 422 **Degradation by RNaseI**

423 The RIN showed a rapid response to RNase I degradation with a decrease from 7.1 to 6  
424 between 0 and 2U/ $\mu$ g (Fig. 4A & 4B.) as seen on virtual gels and electropherograms with an  
425 almost complete disappearance of the 23S rRNA. When using 10U/ $\mu$ g and higher  
426 concentrations, the RIN decreased and remained stable at approximately 2.5 indicating  
427 advanced/almost complete degradation of the RNA. Complete destruction of both rRNA and  
428 an accumulation of small size RNA molecules on the electropherogram can be observed (Fig  
429 4A). In contrast, enzymatic degradation by RNase I had a relatively small effect on the Ct of  
430 the *amoA* transcript at low concentration (only 0.2 Ct increase between 0U/ $\mu$ g and 2U/ $\mu$ g  
431 treatments) (Fig. 4B). Ct values for *amoA* increased with greater degradation of the parent  
432 RNA (3 Cts difference at 10 and 20U/ $\mu$ g and 5 Cts at 40U/ $\mu$ g compared to 0U/ $\mu$ g control). Of  
433 note, *amoA* transcripts were still quantified from the degraded 40U/ $\mu$ g treatment with a mean  
434 Ct of 31.8. RNase I seemed to be the most effective treatment for the destruction of rRNA.  
435 Indeed, an increase of  $\approx 3.2$  Cts for the *16S rRNA* transcript was observed between 0 and  
436 40U/ $\mu$ g treatments whereas an increase of only 2.2 Cts was observed between 0 and 90min  
437 for both physical degradation techniques (heat and UV).  $R_{amp}$  indexes were only slightly  
438 affected by 2U RNaseI/ $\mu$ g (decrease of  $\approx 0.015$  for 380/120 and  $\approx 0.03$  for 380/170) (Fig.  
439 4C.). The decrease was more pronounced for both  $R_{amp}$  at higher concentrations of RNaseI  
440 ( $\approx 0.25$  decrease at 20U/ $\mu$ g compared to 0U control). Even at concentrations as high as  
441 40U/ $\mu$ g the  $R_{amp}$  indexes only reached 0.3. This indicated that at the high nuclease  
442 concentrations, even the small amplicons (120 and 170bp) were starting to degrade. In this  
443 experiment, the  $R_{amp}$  380/170 seemed to be more sensitive than the  $R_{amp}$  380/120 in mapping  
444 RNA degradation, with significant differences between 0 and 10U/ $\mu$ g treatments whereas  
445  $R_{amp}$  380/120 values only became significantly different from 0U control from 20U/ $\mu$ g.  
446 Again, as observed in the other degradation experiments, the behaviour of the *amoA* Ct was

447 better reflected by changes in  $R_{amp}$ , especially  $R_{amp}$  380/170, rather than by changes in the  
448 RIN.

449

#### 450 **Effect of freeze/thaw cycles**

451 The effect of repeated cycles of freeze thaw on RNA is still poorly understood (and rarely  
452 studied) as conflicting results are reported, yet this is a common cause for concern when  
453 working with RNA. In our experiments, repeated freeze/thaw cycle (up to 10) did not induce  
454 any noticeable effects on RNA integrity, whether monitored via RIN or  $R_{amp}$  (data not shown).  
455 The effect of long term storage was also investigated but no effect could be seen after four  
456 months storage at  $-80^{\circ}\text{C}$ .

457

#### 458 **Comparison between $R_{amp}$ and RIN**

459 Data generated from all of the degradation experiments undertaken (UV, heat and RNaseI)  
460 was compiled to determine which of the two integrity indexes (RIN VS  $R_{amp}$ ) reflected the  
461 degradation status of the *amoA* and 16S rRNA transcripts more closely as determined by RT-  
462 Q-PCR. This was done by calculating Kendall correlations between either the  $R_{amp}$  or the RIN  
463 and the Cts of the two gene transcript targets (Fig 5). When considering all three degradation  
464 experiments, that is UV, heat and *RNaseI*, the RIN was not significantly correlated with 16S  
465 rRNA nor *amoA* Ct values ( $p.\text{value} > 0.05$ ). In contrast, the  $R_{amp}$  380/170 ratio resulted in a  
466 significant correlation with both *amoA* and 16S rRNA transcripts. The shorter  $R_{amp}$  380/120  
467 ratio was significantly correlated with *amoA* only (Fig 5A). However, as the RIN was almost  
468 insensitive to UV, with a decrease of only about  $\approx 1$  after 90min exposure (Fig. 2), Kendall  
469 correlations were repeated without the inclusion of the UV data set. In this case, both the RIN  
470 and the  $R_{amp}$  were significantly correlated with 16S rRNA and *amoA* transcript abundances  
471 within the degraded RNA samples (Fig. 5B). In fact, the RIN was better correlated with

472 *amoA* than 16S rRNA Cts. Nevertheless, both  $R_{amp}$  ratios were more highly correlated with  
473 *amoA* Cts than the RIN. Furthermore, the  $R_{amp}$  approach was more highly correlated with the  
474 16S rRNA than the RIN. Taken together, these two observations confirm that the  $R_{amp}$   
475 indexes better reflected RT-Q-PCR changes induced by RNA degradation than the RIN.

476

#### 477 **Effect of RNA degradation on transcript community composition**

478 RNA degradation impacted upon *amoA*, *glnA* and *16S rRNA* gene quantification, as  
479 demonstrated previously. However, whether all members of the community were affected  
480 equally was still to be determined. To answer this question, cDNA amplicons of the Bacterial  
481 16S rRNA, *amoA* and *glnA* transcripts underwent Illumina MISeq amplicon sequencing from  
482 all degradation points of the RNase I experiment representing RNA with RIN values from 7.5  
483 to 2.4 and  $R_{amp}$  values from  $\approx 0.8$  to  $\approx 0.3$  and from  $\approx 0.7$  to  $\approx 0.3$  for Ramp 380/170 and Ramp  
484 380/120 respectively. The effect of RNaseI treatment on community evenness was tested  
485 using PERMANOVA. Results are presented in Table 2 and figures 6, 7 and 8. Interestingly,  
486 the community structure of the three transcripts studied responded differently.

487 Strikingly, RNase I treatment had little effect on *16S rRNA* transcript community evenness  
488 (Fig 6A). Indeed, for individual OTUs, none of the members of the community were  
489 significantly differentially represented ( $p$ .value  $\log_2$  difference  $>0.05$ ) within highly degraded  
490 samples in comparison to controls (Fig 6B). For individual OTU's at least 90% had their  
491 relative expression change over the degradation experiment fall within the  $[-\log_2(1.5);$   
492  $\log_2(1.5)]$  interval, even when comparing controls to the completely degraded 40U RNase I  
493 sample (Fig 6B). This indicates that *16S rRNA* OTU transcript community was responding  
494 evenly to degradation, with each member having the same chance to be affected regardless of  
495 its abundance or sequence.

496 For bacterial *amoA* transcript community there was no change in the overall composition with  
497 increasing degradation as reflected by the non-significant PERMANOVA ( $p.value > 0.05$ ).  
498 However, with increasing degradation, there was an increasing difference in the community  
499 evenness among replicates. Furthermore, unlike 16S rRNA transcripts, when examining  
500 individual *amoA* OTUs it was evident that in the degraded samples some OTUs were  
501 differentially represented at a significant level compared to controls (Fig. 7B). In fact, some  
502 OTUs in the highly degraded samples (10, 20 and 40U RNase I) had a fold change difference  
503 of up to 2 orders of magnitude compared to the controls and in most cases, resulting in their  
504 over representation in degraded samples (see Additional file 3). Moreover, in the more highly  
505 degraded treatments (10, 20 and 40U RNase I), up to 44% of *amoA* OTUs had their relative  
506 expression outside the  $[-\log_2(1.5); \log_2(1.5)]$  interval, compared to the starting RNA (Fig 7  
507 B). So while there was not an overall significant difference in *amoA* community structure with  
508 increasing RNA degradation, there were changes in the relative expression of individual  
509 OTUs. The lack of overall statistical significance in community structure may in fact be  
510 explained by the overall lower numbers of *amoA* OTUs for comparison and the increasing  
511 difference among replicates in the degraded samples.

512 The effect of RNase I treatment was much more pronounced for *glnA* transcripts, than  
513 for *amoA*, and a significant change in community composition with increasing degradation  
514 was observed ( $p.value < 0.05$  for PERMANOVA with both Bray-Curtis and Unifrac distances)  
515 (Fig 8A & 8B). As seen with *amoA*, the difference in community composition between  
516 replicates also increased with increasing RNase I treatment. Moreover, this effect was also  
517 observed at individual OTU level with a large fraction of the individual OTUs showing  
518 different expression levels in treated samples compared to controls (Fig. 8B). As seen for  
519 *amoA*, some *glnA* OTUs were highly over represented in degraded samples by 2 to 3 orders of  
520 magnitudes (Additional file 3), *e.g.* when comparing the untreated samples (NT) to the

521 40URNase samples, 0.28% (3 sequences) were over represented by 2 orders of magnitude.  
522 When comparing the samples treated with buffer only to the 40URNase samples, 2.43% (19  
523 sequences) were over represented by 2 orders of magnitude and 0.13% (1 sequence) by 3  
524 orders of magnitude.

525

## 526 Discussion

527 Here we successfully designed and tested the Ratio Amplicon,  $R_{amp}$ , index. The  
528 concept is that as RNA degrades, longer strands are preferentially affected and the abundance  
529 of the longer amplicon relative to the shorter amplicon will decrease with increasing RNA  
530 degradation [18]. Using experimentally degraded environmental RNA we have shown that the  
531 newly developed  $R_{amp}$  index was a better predictor of the Ct of the target mRNA transcript  
532 used in this study, *amoA*, than the ribosome based RIN approach. In fact, when data from the  
533 three degradation experiments carried out was considered together only the  $R_{amp}$  statistically  
534 correlated with *amoA* Cts. As the RIN failed to detect UV degradation, we removed this data  
535 from the correlations calculation to determine if this data set was biasing the results towards  
536 the  $R_{amp}$  approach. In this case, there was also a significant correlation between the RIN and  
537 *amoA* Ct (-0.51). However, the  $R_{amp}$  index still reflected the fate of the mRNA better than the  
538 RIN (-0.72 and -0.77 for  $R_{amp}$  380/120 and  $R_{amp}$  380/170 respectively).

539 Taking the different RNA degradation approaches used individually, the RIN and  $R_{amp}$   
540 ratios responded differently. As noted above, the RIN did not change over a 90-minute  
541 exposure to UV. UV causes intramolecular crosslinking of thymines but does not cause strand  
542 breaks [47] while the RIN monitors strand break. Similar results were obtained by Bjorkman *et*  
543 *al* [18] who reported a lack of response for the RIN and the RQI when human RNA  
544 preparations were degraded by UV radiation, even after 120 minutes of exposure. As such  
545 RNA damage by UV can't be detected by electrophoresis separation but is recorded by RT-Q-

546 PCR  $R_{amp}$  index. Other RNA degradation processes that result in base destruction but not  
547 necessarily strand break include oxidative damage [48] or chemically-induced radical  
548 formation [49].

549 In contrast, the RIN was the most efficient method to detect heat degradation. There  
550 was a strong and significant decrease in this index after 10 minutes whereas the  $R_{amp}$  indexes  
551 only became significantly different from the controls after 45 minutes. Moreover, there was  
552 very little effect on the direct quantification of the transcripts by RT-Q-PCR with very little  
553 change in the Ct of either *amoA* or 16S rRNA in the first 10 minutes at 90°C. Initially, heat  
554 degradation caused a rapid decrease in the RIN. However, at this point the RT-Q-PCR targets  
555 were actually responding more slowly and were more closely mapped by the  $R_{amp}$  than the  
556 RIN. Björkman *et al* [18] showed a similar response of their differential amplicon, the  
557  $\Delta\Delta_{amp}$  index, that didn't change much between 2 and 10 min at 95°C whereas the RIN  
558 rapidly reduced from 7 to 2. Moreover, Gingrich *et al* [50] showed that transcripts could be  
559 quantified from RNA preparations incubated at 90°C for several hours. This relatively low  
560 impact of heat on RNA quantification may be due to modification of RNA secondary  
561 structures which could result in more efficient cDNA synthesis and mask the effect of the  
562 heat-induced reduction of RNA integrity. More likely it is due to the small amplicon size of  
563 the targets that are unaffected by degradation. This essentially illustrates the difference in the  
564 methods used to monitor RNA degradation - the RIN detects strand break no matter where the  
565 fracture occurs along the transcript while the  $R_{amp}$ , will only detect degradation if the break  
566 occurs between primer binding sites.

567 RNA degradation using the nuclease enzyme RNase I was monitored using both RIN  
568 and  $R_{amp}$ . A similar behaviour could be observed here as in the heat degradation experiment  
569 with the RIN responding more quickly but losing sensitivity when RNA was highly  
570 degraded whereas the  $R_{amp}$  responded slightly later but remained sensitive when RNA was

571 extensively degraded. RNase I was the degradation method that had the strongest effect on the  
572 16S rRNA Ct. RNase I activity is dependent on the concentration of the substrate. If rRNA  
573 and mRNA are considered as two distinct substrates, it can be expected that RNase I will have  
574 a greater impact on ribosomes as they constitute 80-85% of total RNA. Furthermore, cDNA  
575 synthesis from mRNA would be enhanced in preparations where rRNA was depleted [51].  
576 This dynamic may mask and change the effect of degradation over time, which would explain  
577 the relatively low increase in Ct for *amoA* at the beginning of the RNase I degradation  
578 experiment. Nevertheless, in this experiment and generally, for all degradation tests carried  
579 out, the behaviour of the *amoA* Ct was better predicted by the  $R_{amp}$ , as reflected by the higher  
580 correlation coefficient between  $R_{amp}$  indexes and *amoA* Ct than the RIN (Fig. 5). As the *in-*  
581 *vitro* half-life of different transcripts is not well understood and has been shown to vary [52–  
582 54] further work is required to test the correlation of the  $R_{amp}$  against a larger range of  
583 mRNAs. For ribosomal RNA, while the correlation between the  $R_{amp}$  index and 16S rRNA Ct  
584 was lower than for *amoA*, it still correlated better with RNA degradation than the RIN. This  
585 indicates that the outcome of 16S rRNA analysis was less affected by degradation than our  
586 mRNA targets. There are two factors that may contribute to this, the reported greater  
587 robustness of ribosomal RNA than mRNA and the shorter (~103 bp) 16S rRNA amplicon.  
588 That ribosomal RNAs behave the same as mRNA has never been proven. On the contrary,  
589 Sidova *et al* [55] showed that when natural *post-mortem* degradation occurs, rRNA is more  
590 stable than mRNA. In this case, rRNA is a poor predictor of degradation of the mRNA  
591 fraction, as supported by this work. As mRNA is subjected to more rapid decay to adjust to  
592 the needs of the cell whereas rRNA are degraded only under certain stress conditions or when  
593 defective [56] then these intrinsic differences in stability properties may also affect  
594 degradation rates of the different class of RNA post-extraction. Therefore, based on this work  
595 we can conclude that the  $R_{amp}$  was a better predictor of mRNA integrity than the RIN.



596 However, as we and others [18] have shown RNA responds differently to different types of  
597 degradation e.g. strand break verses intramolecular crosslinking of thymines, and as the exact  
598 and likely multiple causes of post-extraction degradation are unknown, we recommend that  
599 the RIN is used in conjunction with the  $R_{amp}$  to monitor RNA integrity.

600

### 601 **Which $R_{amp}$ to use?**

602 Since, in practice, only one  $R_{amp}$  index is necessary, we recommend using the  $R_{amp}$  380/170. In  
603 theory, the higher the difference between the two amplicons the more sensitive the index  
604 would be. We initially designed a 500bp *glnA* PCR amplicon however, the Q-PCR assay  
605 failed to produce a single diagnostic melt curve analysis. The  $R_{amp}$  380/170 always had a  
606 higher value than the  $R_{amp}$  380/120 which would indicate that the number of 170bp targets is  
607 higher than the 120bp. Since both are amplified from the same target, this is not possible and  
608 the explanation for this observation is the lower efficiency of the 120bp Q-PCR compared to  
609 the 170bp assay. In spite of this, both  $R_{amp}$  correlated similarly well overall with each  
610 degradation experiment, with  $R_{amp}$  380/170 slightly more sensitive in the RNase I experiment.

611

### 612 **Impact of experimental degradation of environmental RNA on ribosomal (16S rRNA) 613 and mRNA (*amoA*) community diversity.**

614 For complex environmental communities, the integrity of RNA is not only important to  
615 evaluate quantitative gene expression, but is also of significance if it adversely affects the  
616 relative abundance of transcript diversity. To examine this, we assessed changes in the  
617 community structure of the 16S rRNA, *amoA* and *glnA* transcripts from all fractions of the  
618 RNase I sequentially degraded RNA.

619 The results were surprising with successful amplicon sequencing even from highly degraded  
620 samples. Nevertheless, the data did suggest a different response of 16S rRNA and mRNA  
621 transcripts to degradation, with 16S rRNA community structure unaffected over the range of  
622 degraded RNA samples. That is a statistically similar community was present in the control  
623 non-degraded samples as in the totally destroyed 40 Units RNase I (with a mean RIN of 2.5  
624 and  $R_{amp}$  of 0.32 and 0.27 for  $R_{amp}$  380/120 and Ramp 38/170 respectively). This indicates that  
625 while total RNA was degraded, the small transcript fragments required for RT-PCR and  
626 amplicon sequencing remained intact. In fact, so much so that no significant change in the  
627 relative abundance of individual OTUs was observed.

628 On the other hand, RNA degradation had a greater influence on both *amoA* and *glnA* mRNA  
629 targets. While, again surprisingly, transcript amplicons were successfully detected from all  
630 degradation status samples, greater variability between degraded replicates was observed.  
631 This resulted in statistically different communities for *glnA* but not *amoA* when compared to  
632 the same non-degraded control samples. However, the low number of *amoA* OTUs and  
633 increased variability between replicates contributed to the lower statistical power resulting in  
634 no statistical difference between treatments (Fig. 6). Furthermore, there were significant,  
635 sometimes up to 2 to 3 orders of magnitude change in the relative abundance of individual  
636 *glnA* and *amoA* OTUs in the degraded samples verses control samples. So, while we could  
637 successfully amplify mRNA transcripts from degraded environmental samples, we have  
638 shown that the relative composition of the community members was adversely affected by  
639 degradation and was not representative of the initial starting point. While further work is  
640 needed to determine the impact of degradation across the entire transcriptome to see if all  
641 mRNA's respond in a similar manner, it is clear from our mRNA amplicon sequencing that  
642 RNA degradation will alter the outcome of community analysis. It is therefore necessary to  
643 ensure the RNA integrity of the sample is known prior to interpretation of results. For this our

644 data indicates that a combination approach targeting both ribosomal (the RIN) and mRNA  
645 (the  $R_{amp}$ ) is needed.

646

#### 647 **Best Practice for Environmental RNA**

648 The challenge when working with environmental samples will always be to retrieve RNA of a  
649 high enough quality and integrity. Here we started with RNA extracted from marine  
650 sediments that had an average RIN of  $\approx 7$  and  $R_{amp}$  of  $\approx 0.8$ . This is the best quality RNA we  
651 could produce with this beat-beating co-extraction method [36] and it already falls at the  
652 lower end of acceptable RIN for pure culture [10]. Therefore, methods to improve the initial  
653 quality of RNA extractions should also be a high priority, although this will be easier in some  
654 environments than others. Improvement of extraction methods is crucial as it can lead to  
655 important differences in the results. For example Feike *et al* [57] showed that different  
656 sampling techniques influenced the relative abundance of transcripts retrieved from the  
657 suboxic zone of the Baltic Sea. Next, the integrity of the extracted RNA should be  
658 determined, and it should be ensured that the integrity value is similar among samples to be  
659 compared. Here the  $R_{amp}$  approach should be a useful tool to complement current  
660 electrophoretic approaches, such as the RIN prior to extensive downstream analysis.

661 Another consideration raised by this work is in the very fact that the differential amplicon  
662 approach works. This shows that small cDNA amplicons can still be produced from highly  
663 degraded RNA samples whereas long amplicons tend to disappear quickly. When using RNA  
664 samples of poor quality, the comparison of expression levels between different targets might  
665 be irrelevant if the difference in length of the RT-Q-PCR targets between genes is large. In  
666 this case it would be better to use only small amplicons, that are less sensitive to degradation  
667 [58]. An alternative, to deal with samples with different degradation status, potentially could

668 be to normalize RT-Q-PCR data to RNA integrity. A RIN based algorithm has been proposed  
669 by Ho-Pun-Cheung *et al* [59] to reduce RT-Q-PCR errors due to RNA degradation in cancer  
670 biopsies. In our case however,  $R_{amp}$  indexes correlated better than the RIN with *amoA* and 16S  
671 rRNA Cts, making them better potential candidates as normalisation metrics. Therefore we  
672 tested a normalisation coefficient based on the  $R_{amp}$  (Additional file 2; Figure S2). As in Ho-  
673 Pun-Cheung *et al* [59], we assumed a linear relationship between the integrity index and the  
674 changes in transcript Cts (*i.e.* change in Ct =  $\alpha$  x change in  $R_{amp}$ ). This assumption facilitated  
675 the calculation of a regression coefficient  $\alpha$  that was used to normalize Cts as explained in  
676 figure S2. Although the use of such normalization reduced the errors attributable to RNA  
677 degradation (Additional file 2; Figure S2.), several limitations remain: 1) the linear  
678 relationship between changes in Cts and  $R_{amp}$  might not always be true depending on the  
679 transcript tested, 2) the regression coefficient  $\alpha$  depends on the degradation technique  
680 (Additional file 2; Table S1), 3) the regression coefficient  $\alpha$  depends on the transcript tested  
681 (Additional file 2; Table S1) and 4) the regression coefficient  $\alpha$  may depend on the  
682 environment from which RNA was extracted. Until more work is done to validate such  
683 normalization strategies, or to dramatically improve the quality of the RNA that can be  
684 extracted from environmental samples [57], we recommend using integrity indexes  
685 (differential amplicon and microfluidics based techniques) as initial quality checks of RNA  
686 and advise not to make absolute comparisons among samples with dissimilar integrity status.

687

## 688 **Conclusion**

689 Assessing RNA quality is essential for obtaining meaningful transcriptomic results. The  
690 current approach to monitor RNA integrity include the RIN and RQI. This is a useful  
691 technique that is widely under-used (or reported) in microbial transcriptomics studies, to give

692 an overview of total RNA quality based on a ratio between the 23S and 16S ribosomes. Since  
693 most transcriptomics studies are interested in the metabolic function and therefore mRNA, it  
694 would be preferable to have an integrity index to target the mRNA. Furthermore, it is  
695 unknown if degradation of rRNA reflects mRNA degradation. We therefore developed and  
696 experimentally tested a new index, the  $R_{amp}$ , the goal of which was to specifically target  
697 mRNA degradation and we showed that it performed better than the RIN at predicting the  
698 outcome of RT-Q-PCR of a functional gene (*amoA*). It was shown in this study that both  
699 quantitative (RT-Q-PCR) and qualitative (sequencing) results can be obtained, even from very  
700 degraded samples. Comparison of gene expression level between preparations with different  
701 degradation levels can therefore lead to false conclusions if integrity is not checked prior to  
702 analysis. Thus, we encourage microbial ecologists to report integrity indexes in order to  
703 improve reproducibility and facilitate comparison between transcriptomics studies. For this  
704 we propose that a  $R_{amp}$  ratio is used alongside the RIN.

705

## 706 **Abbreviations**

707  $R_{amp}$ : Ratio Amplicon; RIN: RNA Integrity number; RQI: RNA Quality Score; RT-(Q)-PCR:  
708 Reverse Transcriptase (Quantitative) Polymerase Chain Reaction; cDNA: complementary  
709 DNA; Ct: Cycle threshold

710

## 711 **Ethics approval and consent to participate**

712 Not applicable

713

## 714 **Consent for publication**

715 Not applicable

716

717 **Competing interest**

718 The authors declare that they have no competing interest

719

720 **Authors' contribution**

721 CJS supervised the project. CJS and FC designed the experiments. FC carried out the  
722 experiments. FC and CJS analysed the RT-Q-PCR and RIN measurement data. FC and UZI ran  
723 the bioinformatic pipeline for amplicon sequences processing. FC, CJS, UZI and analysed the  
724 amplicon sequencing results. FC, UZI, CJS and wrote the manuscript. All authors read and  
725 approved the final manuscript.

726

727 **Data availability**

728 Ct and RIN data presented in this study are provided in additional file 7. The sequencing  
729 data are available on the European Nucleotide Archive under the study accession number:  
730 PRJEB28215 (<http://www.ebi.ac.uk/ena/data/view/PRJEB28215>) with information about the  
731 samples given in additional file 5 and 6.

732

733 **Acknowledgements**

734 We would like to thank Dr. Aoife Duff for collecting the sediment samples.

735

736 **Funding**

737 FC was supported by a University of Glasgow, School of Engineering EPSRC Doctoral  
738 Scholarship; UZI was funded by NERC IRF NE/L011956/1; CJS was supported by the Royal  
739 Academy of Engineering under the Research Chairs and Senior Research Fellowships scheme  
740 (RCSRF1718643).

741

742 **References**

- 743 1. Medini D, Serruto D, Parkhill J, Relman DA, Donati C, Moxon R, et al. Microbiology in  
744 the post-genomic era. *Nat Rev Microbiol.* 2008;6:419–30.
- 745 2. Moran MA, Satinsky B, Gifford SM, Luo H, Rivers A, Chan LK, et al. Sizing up  
746 metatranscriptomics. *ISME J.* 2013;7:237–43. doi:10.1038/ismej.2012.94.
- 747 3. Evans TG. Considerations for the use of transcriptomics in identifying the “genes that  
748 matter” for environmental adaptation. *J Exp Biol.* 2015;218:1925–35.  
749 doi:10.1242/jeb.114306.
- 750 4. Smith CJ, Nedwell DB, Dong LF, Osborn AM. Evaluation of quantitative polymerase  
751 chain reaction-based approaches for determining gene copy and gene transcript numbers in  
752 environmental samples. *Environ Microbiol.* 2006;8:804–15.
- 753 5. Laalami S, Zig L, Putzer H. Initiation of mRNA decay in bacteria. *Cell Mol Life Sci.*  
754 2014;71:1799–828.
- 755 6. Die J V, Román B. RNA quality assessment: a view from plant qPCR studies. *J Exp Bot.*  
756 2012;63:6069–77.
- 757 7. Copois V, Bibeau F, Bascoul-Mollevis C, Salvétat N, Chalbos P, Bareil C, et al. Impact of  
758 RNA degradation on gene expression profiles: Assessment of different methods to reliably  
759 determine RNA quality. *J Biotechnol.* 2007;127:549–59.
- 760 8. Fleige S, Pfaffl MW. RNA integrity and the effect on the real-time qRT-PCR performance.  
761 *Mol Aspects Med.* 2006;27:126–39.
- 762 9. Fleige S, Walf V, Huch S, Prgomet C, Sehm J, Pfaffl MW. Comparison of relative mRNA  
763 quantification models and the impact of RNA integrity in quantitative real-time RT-PCR.  
764 *Biotechnol Lett.* 2006;28:1601–13.
- 765 10. Jahn CE, Charkowski AO, Willis DK. Evaluation of isolation methods and RNA integrity  
766 for bacterial RNA quantitation. *J Microbiol Methods.* 2008;75:318–24.

- 767 11. Kaczanowska M, Ryden-Aulin M. Ribosome Biogenesis and the Translation Process in  
768 *Escherichia coli*. *Microbiol Mol Biol Rev.* 2007;71:477–94. doi:10.1128/MMBR.00013-07.
- 769 12. Rhodes ME, Oren A, House CH. Dynamics and persistence of dead sea microbial  
770 populations as shown by high-throughput sequencing of rRNA. *Appl Environ Microbiol.*  
771 2012;78:2489–92.
- 772 13. McKillip JL, Jaykus L, Drake M. rRNA Stability in Heat-Killed and UV-Irradiated  
773 Enterotoxigenic *Staphylococcus aureus* and *Escherichia coli* O157 : H7 rRNA Stability in  
774 Heat-Killed and UV-Irradiated Enterotoxigenic *Staphylococcus aureus* and *Escherichia coli*  
775 O157 : H7. *Appl Environ Microbiol.* 1998;64:4264–8.
- 776 14. Rathnayaka USK, Rakshit SK. The stability of rRNA in heat-killed *Salmonella enterica*  
777 cells and its detection by fluorescent in situ hybridisation (FISH). *Trop Life Sci Res.*  
778 2010;21:47–53.
- 779 15. Hurt RA, Qiu X, Wu L, Roh Y, Palumbo A V, Tiedje JM, et al. Simultaneous Recovery of  
780 RNA and DNA from Soils and Sediments. *Appl Environ Microbiol.* 2001;67:4495–503.
- 781 16. Die J V., Obrero Á, González-Verdejo CI, Román B. Characterization of the 3':5' ratio  
782 for reliable determination of RNA quality. *Anal Biochem.* 2011;419:336–8.  
783 doi:10.1016/j.ab.2011.08.012.
- 784 17. Dreyfus M, Régnier P. The poly(A) tail of mRNAs: Bodyguard in eukaryotes, scavenger  
785 in bacteria. *Cell.* 2002;111:611–3.
- 786 18. Björkman J, Švec D, Lott E, Kubista M, Sjöback R. Differential amplicons ( $\delta$ Amp)-a new  
787 molecular method to assess RNA integrity. *Biomol Detect Quantif.* 2016;6:4–12.
- 788 19. Karlsson O, Segerström L, Sjöback R, Nylander I, Borén M. qPCR based mRNA quality  
789 score show intact mRNA after heat stabilization. *Biomol Detect Quantif.* 2016;7:21–6.  
790 doi:10.1016/j.bdq.2016.01.002.
- 791 20. Reck M, Tomasch J, Deng Z, Jarek M, Husemann P, Wagner-Döbler I. Stool



- 792 metatranscriptomics: A technical guideline for mRNA stabilisation and isolation. BMC  
793 Genomics. 2015;16:494. doi:10.1186/s12864-015-1694-y.
- 794 21. Kumada Y, Benson DR, Hillemann D, Hosted TJ, Rochefort D a, Thompson CJ, et al.  
795 Evolution of the glutamine synthetase gene, one of the oldest existing and functioning genes.  
796 Proc Natl Acad Sci U S A. 1993;90:3009–13.
- 797 22. Brown JR, Masuchi Y, Robb FT, Doolittle WF. Evolutionary relationships of bacterial  
798 and archaeal glutamine synthetase genes. J Mol Evol. 1994;38:566–76.
- 799 23. Reitzer L. Nitrogen Assimilation and Global Regulation in *Escherichia coli*. Annu Rev  
800 Microbiol. 2003;57:155–76. doi:10.1146/annurev.micro.57.030502.090820.
- 801 24. Costa R, Gomes NCM, Milling A, Smalla K. An optimized protocol for simultaneous  
802 extraction of DNA and RNA from soils. Brazilian J Microbiol. 2004;35:230–4.
- 803 25. Sharma S, Mehta R, Gupta R, Schloter M. Improved protocol for the extraction of  
804 bacterial mRNA from soils. J Microbiol Methods. 2012;91:62–4.  
805 doi:10.1016/j.mimet.2012.07.016.
- 806 26. Sessitsch A, Gyamfi S, Stralis-Pavese N, Weilharter A, Pfeifer U. RNA isolation from soil  
807 for bacterial community and functional analysis: evaluation of different extraction and soil  
808 conservation protocols. J Microbiol Methods. 2002;51:171–9. doi:S0167701202000659 [pii].
- 809 27. Atkinson MR, Blauwkamp T a, Bondarenko V, Studitsky V, Ninfa AJ. Activation of the  
810 *glnA*, *glnK*, and *nac* Promoters as *Escherichia coli* Undergoes the Transition from Nitrogen  
811 Excess Growth to Nitrogen Starvation. Society. 2002;184:5358–63.
- 812 28. Hua Q, Yang C, Oshima T, Mori H, Shimizu K. Analysis of Gene Expression in  
813 *Escherichia coli* in Response to Changes of Growth-Limiting Nutrient in Chemostat Cultures.  
814 Society. 2004;70:2354–66. doi:10.1128/AEM.70.4.2354.
- 815 29. Leigh JA, Dodsworth JA. Nitrogen Regulation in Bacteria and Archaea. Annu Rev  
816 Microbiol. 2007;61:349–77. doi:10.1146/annurev.micro.61.080706.093409.

- 817 30. Duff AM, Zhang LM, Smith CJ. Small-scale variation of ammonia oxidisers within  
818 intertidal sediments dominated by ammonia-oxidising bacteria *Nitrosomonas* sp. *amoA* genes  
819 and transcripts. *Sci Rep.* 2017;7:1–13. doi:10.1038/s41598-017-13583-x.
- 820 31. Zhang L, Duff A, Smith C. Community and functional shifts in ammonia oxidizers across  
821 terrestrial and marine (soil/sediment) boundaries in two coastal Bay ecosystems. *Environ*  
822 *Microbiol.* 2018;00.
- 823 32. Clark K, Karsch-Mizrachi I, Lipman DJ, Ostell J, Sayers EW. GenBank. *Nucleic Acids*  
824 *Res.* 2016;44:D67–72.
- 825 33. Altschul SF, Gish W, Miller W, Myers EW, Lipman DJ. Basic local alignment search  
826 tool. *J Mol Biol.* 1990;215:403–10. doi:10.1016/S0022-2836(05)80360-2.
- 827 34. Edgar RC. MUSCLE: Multiple sequence alignment with high accuracy and high  
828 throughput. *Nucleic Acids Res.* 2004;32:1792–7.
- 829 35. Kumar S, Stecher G, Tamura K. MEGA7: Molecular Evolutionary Genetics Analysis  
830 Version 7.0 for Bigger Datasets. *Mol Biol Evol.* 2016;33:1870–4.
- 831 36. Griffiths RI, Whiteley AS, O’Donnell AG, Bailey MJ. Rapid method for  
832 coextraction of DNA and RNA from natural environments for analysis of ribosomal DNA-  
833 and rRNA-based microbial community composition. *Appl Environ Microbiol.* 2000;66:5488–  
834 91.
- 835 37. Winter DJ. rentrez: An R package for the NCBI eUtils API. *R J.* 2017;9:520–6.  
836 doi:10.7287/peerj.preprints.3179v2.
- 837 38. Joshi NA, Sickle JNF. A sliding-window, adaptive, quality-based trimming tool for FastQ  
838 files. 2011;:1–9.
- 839 39. Nikolenko SI, Korobeynikov AI, Alekseyev MA. BayesHammer: Bayesian clustering for  
840 error correction in single-cell sequencing. *BMC Genomics.* 2013;14 Suppl 1:1–11.
- 841 40. Schirmer M, Ijaz UZ, D’Amore R, Hall N, Sloan WT, Quince C. Insight into biases and

- 842 sequencing errors for amplicon sequencing with the Illumina MiSeq platform. *Nucleic Acids*  
843 *Res.* 2015;43.
- 844 41. D'Amore R, Ijaz UZ, Schirmer M, Kenny JG, Gregory R, Darby AC, et al. A  
845 comprehensive benchmarking study of protocols and sequencing platforms for 16S rRNA  
846 community profiling. *BMC Genomics.* 2016;17. doi:10.1186/s12864-015-2194-9.
- 847 42. Caporaso JG, Kuczynski J, Stombaugh J, Bittinger K, Bushman FD, Costello EK, et al.  
848 QIIME allows analysis of high-throughput community sequencing data. *Nat Methods.*  
849 2010;7:335–6. doi:10.1038/nmeth.f.303.QIIME.
- 850 43. Katoh K, Asimenos G, Toh H. Multiple Alignment of DNA Sequences with MAFFT. In:  
851 *Bioinformatics for DNA Sequence Analysis, Methods in Molecular Biology.* 2009. p. 39–64.  
852 doi:10.1007/978-1-59745-251-9.
- 853 44. Price MN, Dehal PS, Arkin AP. FastTree 2 - Approximately maximum-likelihood trees  
854 for large alignments. *PLoS One.* 2010;5.
- 855 45. Oksanen J, Kindt R, O'Hara RB. *vegan: Community Ecology Package.* Available from  
856 <http://cc.oulu.fi/~jarioksa/>. 2005;3 January. <http://cc.oulu.fi/~jarioksa/>.
- 857 46. Love MI, Huber W, Anders S. Moderated estimation of fold change and dispersion for  
858 RNA-seq data with DESeq2. *Genome Biol.* 2014;15:1–21.
- 859 47. Kladwang W, Hum J, Das R. Ultraviolet Shadowing of RNA Can Cause Significant  
860 Chemical Damage in Seconds. *Sci Rep.* 2012;2:517. doi:10.1038/srep00517.
- 861 48. Rhee Y, Valentine MR, Termini J. Oxidative base damage in RNA detected by reverse  
862 transcriptase. *Nucleic Acids Res.* 1995;23:3275–82.
- 863 49. Hawkins CL, Davies MJ. Hypochlorite-induced damage to DNA, RNA, and  
864 polynucleotides: Formation of chloramines and nitrogen-centered radicals. *Chem Res*  
865 *Toxicol.* 2002;15:83–92.
- 866 50. Gingrich J, Rubio T, Karlak C. Effect of RNA degradation on the data quality in

- 867 quantitative PCR and microarray experiments. *Bio-Rad Bull.* 2008;:1–6. <http://www.gmo->  
868 [qpcr-analysis.info/gingrich-bulletin-5547A.pdf](http://www.gmo-qpcr-analysis.info/gingrich-bulletin-5547A.pdf).
- 869 51. Petrova OE, Garcia-Alcalde F, Zampaloni C, Sauer K. Comparative evaluation of rRNA  
870 depletion procedures for the improved analysis of bacterial biofilm and mixed pathogen  
871 culture transcriptomes. *Sci Rep.* 2017;7 May 2016:41114. doi:10.1038/srep41114.
- 872 52. Belasco JG. All Things Must Pass: Contrasts and Commonalities in Eukaryotic and  
873 Bacterial mRNA Decay. *Nat Rev Mol Cell Biol.* 2010;11:467–478.
- 874 53. Evguenieva-Hackenberg E, Klug G. New aspects of RNA processing in prokaryotes. *Curr*  
875 *Opin Microbiol.* 2011;14:587–92. doi:10.1016/j.mib.2011.07.025.
- 876 54. Selinger WD, Saxena MR, Cheung K., Church MG, Rosenow C. Global RNA Half-Life  
877 Analysis in. *Genome Res.* 2003; January:216–23.
- 878 55. Sidova M, Tomankova S, Abaffy P, Kubista M, Sindelka R. Effects of post-mortem and  
879 physical degradation on RNA integrity and quality. *Biomol Detect Quantif.* 2015;5:3–9.  
880 doi:10.1016/j.bdq.2015.08.002.
- 881 56. Deutscher MP. Degradation of RNA in bacteria: Comparison of mRNA and stable RNA.  
882 *Nucleic Acids Res.* 2006;34:659–66.
- 883 57. Feike J, Jürgens K, Hollibaugh JT, Krüger S, Jost G, Labrenz M. Measuring unbiased  
884 metatranscriptomics in suboxic waters of the central Baltic Sea using a new in situ fixation  
885 system. *ISME J.* 2012;6:461–70.
- 886 58. Antonov J, Goldstein DR, Oberli A, Baltzer A, Pirotta M, Fleischmann A, et al. Reliable  
887 gene expression measurements from degraded RNA by quantitative real-time PCR depend on  
888 short amplicons and a proper normalization. *Lab Invest.* 2005;85:1040–50.
- 889 59. Ho-Pun-Cheung A, Bascoul-Mollevi C, Assenat E, Boissière-Michot F, Bibeau F, Cellier  
890 D, et al. Reverse transcription-quantitative polymerase chain reaction: Description of a RIN-  
891 based algorithm for accurate data normalization. *BMC Mol Biol.* 2009;10:1–10.

- 892 60. Hornek R, Pommerening-Röser A, Koops HP, Farnleitner AH, Kreuzinger N, Kirschner  
893 A, et al. Primers containing universal bases reduce multiple amoA gene specific DGGE band  
894 patterns when analysing the diversity of beta-ammonia oxidizers in the environment. J  
895 Microbiol Methods. 2006;66:147–55.
- 896 61. Suzuki MT, Taylor LT, Delong EF, Long EFDE. Quantitative Analysis of Small-Subunit  
897 rRNA Genes in Mixed Microbial Populations via 5' -Nuclease Assays Quantitative Analysis  
898 of Small-Subunit rRNA Genes in Mixed Microbial Populations via 5 J -Nuclease Assays.  
899 2000;66:4605–14.
- 900 62. Marchesi JR, Sato T, Weightman AJ, Martin TA, Fry JC, Hiom SJ, et al. Design and  
901 evaluation of useful bacterium-specific PCR primers that amplify genes coding for bacterial  
902 16S rRNA. Appl Environ Microbiol. 1998;64:795–9.
- 903 63. Lee TK, Van Doan T, Yoo K, Choi S, Kim C, Park J. Discovery of commonly existing  
904 anode biofilm microbes in two different wastewater treatment MFCs using FLX Titanium  
905 pyrosequencing. Appl Microbiol Biotechnol. 2010;87:2335–43.
- 906 64. Parada AE, Needham DM, Fuhrman JA. Every base matters: Assessing small subunit  
907 rRNA primers for marine microbiomes with mock communities, time series and global field  
908 samples. Environ Microbiol. 2016;18:1403–14.
- 909 65. Caporaso JG, Kuczynski J, Stombaugh J, Bittinger K, Bushman FD, Costello EK, et al.  
910 correspondence QIIME allows analysis of high- throughput community sequencing data  
911 Intensity normalization improves color calling in SOLiD sequencing. Nat Publ Gr.  
912 2010;7:335–6. doi:10.1038/nmeth0510-335.

913

## 914 **Figure Legends**

915 **Fig 1. Schematic representation of primer binding sites along the Bacterial *glnA* gene.**

916 Primers are represented by arrows pointing to the right (forward primers) or to the left

917 (reverse primer). The amplicons (Amp) generated by the different primer combinations are  
918 represented as colored lines. The formulas used to calculate the two  $R_{amp}$  indexes are detailed  
919 under the figure.

920

921 **Fig 2. Effect of heat degradation on RNA integrity measured via the RIN (A), with RT-**  
922 **Q-PCR (B) and RIN versus  $R_{amp}$  (C).** For RIN, RNA integrity visualised in virtual gels (A;  
923 left) and electropherogram (A; right) are displayed against incubation period at 90°C. B)  
924 Effect of degradation on transcript quantification; Amp 1-3: average Ct (n=3) of one of the  
925 three possible *glnA* amplicons; *amoA*: average *amoA* Ct (n=3) of the Bacterial *amoA*  
926 transcript; *16S rRNA*: average *16S rRNA* Ct (n=3) of the bacterial *16S rRNA* transcript. Letters  
927 indicate the result of TukeyHSD tests (points with different letters had values significantly  
928 different from each other using 0.05 as threshold for the *p*.value). Effect of RNA degradation  
929 on  $R_{amp}$  index is presented in Fig. C. The  $R_{amp}$  380/120 was calculated as  $\frac{35-ct(Amp\ 3)}{35-ct(Amp\ 1)}$  and the  
930  $R_{amp}$  380/170 as  $\frac{35-ct(Amp\ 3)}{35-ct(Amp\ 2)}$ . For comparison, RIN values were also plotted.

931

932 **Fig 3. Effect of UV degradation on RNA integrity measured via the RIN (A), with RT-Q-**  
933 **PCR (B) and RIN versus  $R_{amp}$  (C).** For RIN, RNA integrity visualised in virtual gels (A;  
934 left) and electropherogram (A; right) are displayed against incubation period under UV. B)  
935 Effect of degradation on transcript quantification; Amp 1-3: average Ct (n=3) of one of the  
936 three possible *glnA* amplicons; *amoA*: average *amoA* Ct (n=3) of the Bacterial *amoA*  
937 transcript; *16S rRNA*: average *16S rRNA* Ct (n=3) of the bacterial *16S rRNA* transcript. Letters  
938 indicate the result of TukeyHSD tests (points with different letters had values significantly  
939 different from each other using 0.05 as threshold for the *p*.value). Effect of RNA degradation

940 on  $R_{amp}$  index is presented in Fig. C. The  $R_{amp}$  380/120 was calculated as  $\frac{35-ct(Amp\ 3)}{35-ct(Amp\ 1)}$  and the  
941 Ramp 380/170 as  $\frac{35-ct(Amp\ 3)}{35-ct(Amp\ 2)}$ . For comparison, RIN values were also plotted.

942

943 **Fig 4. Effect of RNase I degradation on RNA integrity measured via the RIN (A), with**  
944 **RT-Q-PCR (B) and RIN versus  $R_{amp}$  (C).** For RIN, RNA integrity visualised in virtual gels  
945 (A; left) and electropherogram (A; right) are displayed against incubation period with RNase I  
946 B) Effect of degradation on transcript quantification; Amp 1-3: average Ct (n=3) of one of the  
947 three possible *glnA* amplicons; *amoA*: average *amoA* Ct (n=3) of the Bacterial *amoA*  
948 transcript; *16S rRNA*: average *16S rRNA* Ct (n=3) of the bacterial *16S rRNA* transcript. Letters  
949 indicate the result of TukeyHSD tests (points with different letters had values significantly  
950 different from each other using 0.05 as threshold for the *p*.value). Effect of RNA degradation  
951 on  $R_{amp}$  index is presented in Fig. C. The  $R_{amp}$  380/120 was calculated as  $\frac{35-ct(Amp\ 3)}{35-ct(Amp\ 1)}$  and the  
952 Ramp 380/170 as  $\frac{35-ct(Amp\ 3)}{35-ct(Amp\ 2)}$ . For comparison, RIN values were also plotted.

953

954 **Fig 5. Kendall correlations between integrity indexes and Cts of the two reference gene**  
955 **used in this study.** The correlations coefficients were calculated using all data generated from  
956 UV, heat and RNaseI degradation experiments (left) and from the heat and RNase I only  
957 (right). Black crosses indicate absence of significant correlation (threshold: *p* value>0.05).

958

959 **Fig 6. Effect of RNase I treatment on 16S rRNA transcript composition.** Bar charts (A)  
960 represent changes in community composition of the 50 most abundant taxa. Scatterplots (B)  
961 represent log<sub>2</sub> changes of individual taxa along the degradation gradient relative to control  
962 experiments (no treatment control (NT) or buffer only control (0URNaseI/μl)) as indicated by

963 black arrows. Taxa with a significant difference ( $p.value < 0.05$ ) in expression greater than or  
964 equal to a 2-fold change (positively or negatively) relative to controls are indicated in red.

965

966 **Fig. 7 Effect of RNase I treatment on *amoA* transcript composition.** Bar charts (A)  
967 represent changes in community composition of the 50 most abundant taxa. Scatterplots (B)  
968 represent log<sub>2</sub> changes of individual taxa along the degradation gradient relative to control  
969 experiments (no treatment control (NT) or buffer only control (0URNaseI/μl)) as indicated by  
970 black arrows. Taxa with a significant difference ( $p.value < 0.05$ ) in expression greater than or  
971 equal to a 2-fold change (positively or negatively) relative to controls are indicated in red.

972

973 **Fig. 8 Effect of RNase I treatment on *glnA* transcript composition.** Bar charts (A)  
974 represent changes in community composition of the 50 most abundant taxa. Scatterplots (B)  
975 represent log<sub>2</sub> changes of individual taxa along the degradation gradient relative to control  
976 experiments (no treatment control (NT) or buffer only control (0URNaseI/μl)) as indicated by  
977 black arrows. Taxa with a significant difference ( $p.value < 0.05$ ) in expression greater than or  
978 equal to a 2-fold change (positively or negatively) relative to controls are indicated in red.

979

980

981

982

983

984

985

986



987 **Tables**

988 **Table 1** List of primers used in this study.

| Primer     | Sequence (5' → 3')     | Orientation | Target                                     | Experiment           | Reference                                          |
|------------|------------------------|-------------|--------------------------------------------|----------------------|----------------------------------------------------|
| GS1_new    | GCTTGAGGATGCCGCCGATGTA | Reverse     | Bacterial <i>glnA</i> , all amplicons      | Q-PCR and sequencing | This study, modified from Hurt and co-workers (14) |
| GSFw1200   | GGTTCGGGCATGCACGTGCA   | Forward     | Bacterial <i>glnA</i> , amplicon 1 (120bp) | Q-PCR                | This study                                         |
| GS2_new    | AAGACCGCGACCTTNATGCC   | Forward     | Bacterial <i>glnA</i> , amplicon 2 (170bp) | Q-PCR                | This study, modified from Hurt and co-workers (14) |
| GSFw900    | GTCAARGGCGGYTAYTTCCC   | Forward     | Bacterial <i>glnA</i> , amplicon 3 (380bp) | Q-PCR and sequencing | This study                                         |
| GSFw800    | GAAGCCGAGTTCTTCTCTTCGA | Forward     | Bacterial <i>glnA</i> , amplicon 4 (540bp) | PCR                  | This study                                         |
| BacamoA-1F | GGGGHTTYTACTGGTGGT     | Forward     | Bacterial <i>amoA</i> gene (435bp)         | Q-PCR and sequencing | [60]                                               |
| BacamoA-2R | CCCCTCBGSAAAVCCTTCTTC  | Reverse     |                                            |                      |                                                    |
| 1369F      | CGGTGAATACGTTTCYCGG    | Forward     | Bacterial 16S rRNA gene (123 bp)           | Q-PCR                | [61]                                               |
| 1492R      | GGWTACCTTGTTACGACTT    | Reverse     |                                            |                      |                                                    |
| 1389P      | CTTGTACACACCGCCCGTC    | Probe       |                                            |                      |                                                    |
| F63        | CAGGCCTAACACATGGCAAGTC | Forward     | Bacterial 16S rRNA                         | PCR                  | [62]                                               |
| 518R       | ATTACCGCGCTGCTGG       | Reverse     | V1→V3 (455bp)                              |                      | [63]                                               |

|      |                            |         |                    |            |      |
|------|----------------------------|---------|--------------------|------------|------|
| 515F | GTG YCA GCM GCC GCG GTA A  | Forward | Bacterial 16S rRNA | Sequencing | [64] |
| 806R | GGA CTA CNV GGG TWT CTA AT | Reverse | V4 (291bp)         |            | [65] |

---

989

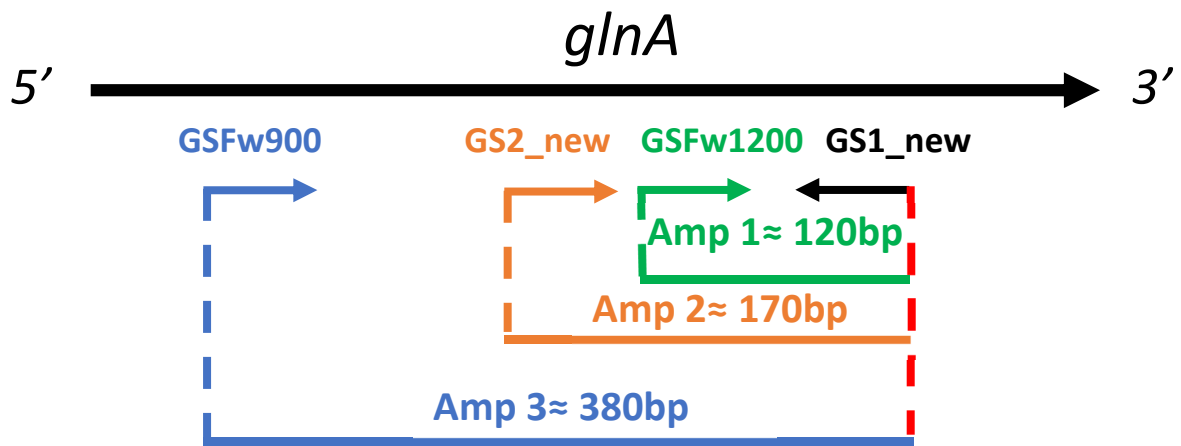

$$\text{Ramp } 380/120 = \frac{35 - \text{Ct Amp } 3}{35 - \text{Ct Amp } 1}$$

$$\text{Ramp } 380/170 = \frac{35 - \text{Ct Amp } 3}{35 - \text{Ct Amp } 2}$$

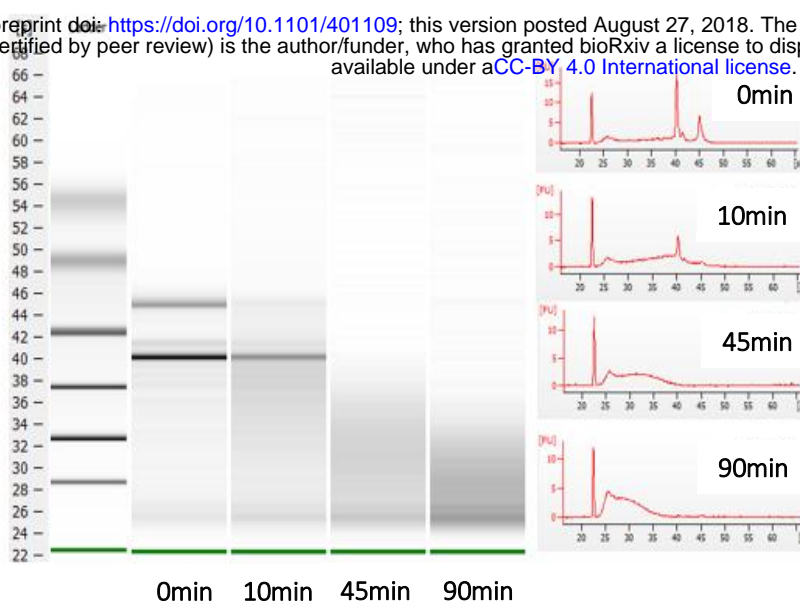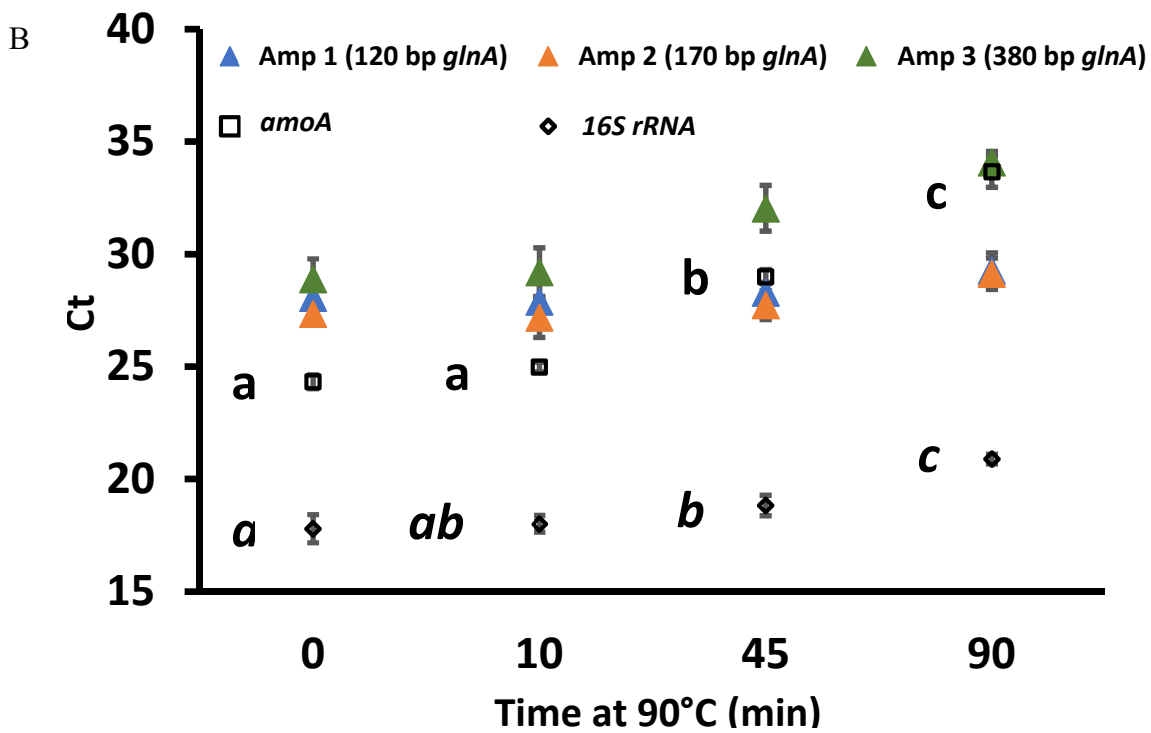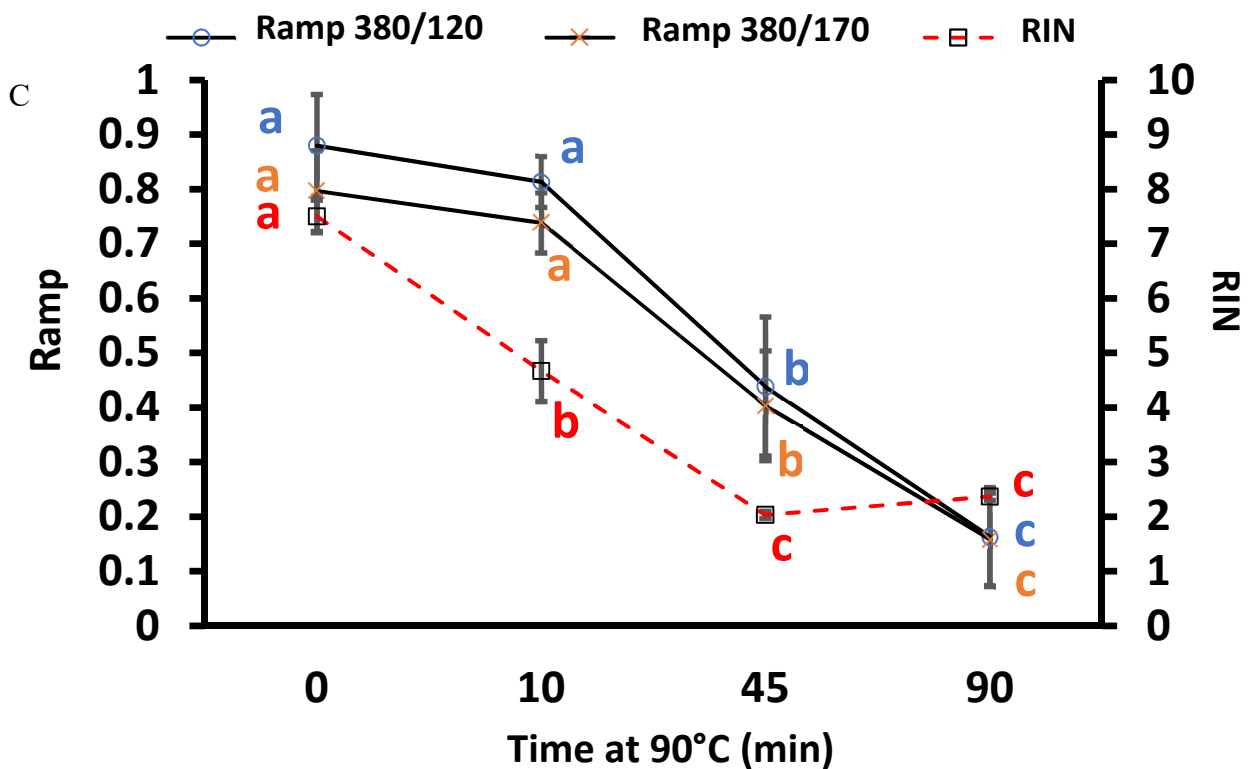

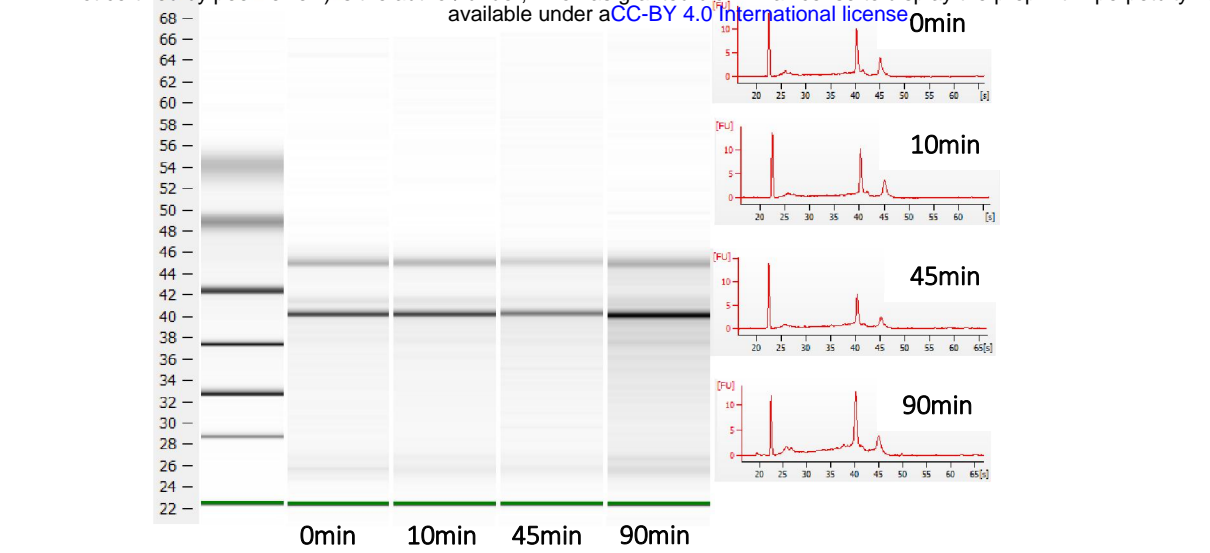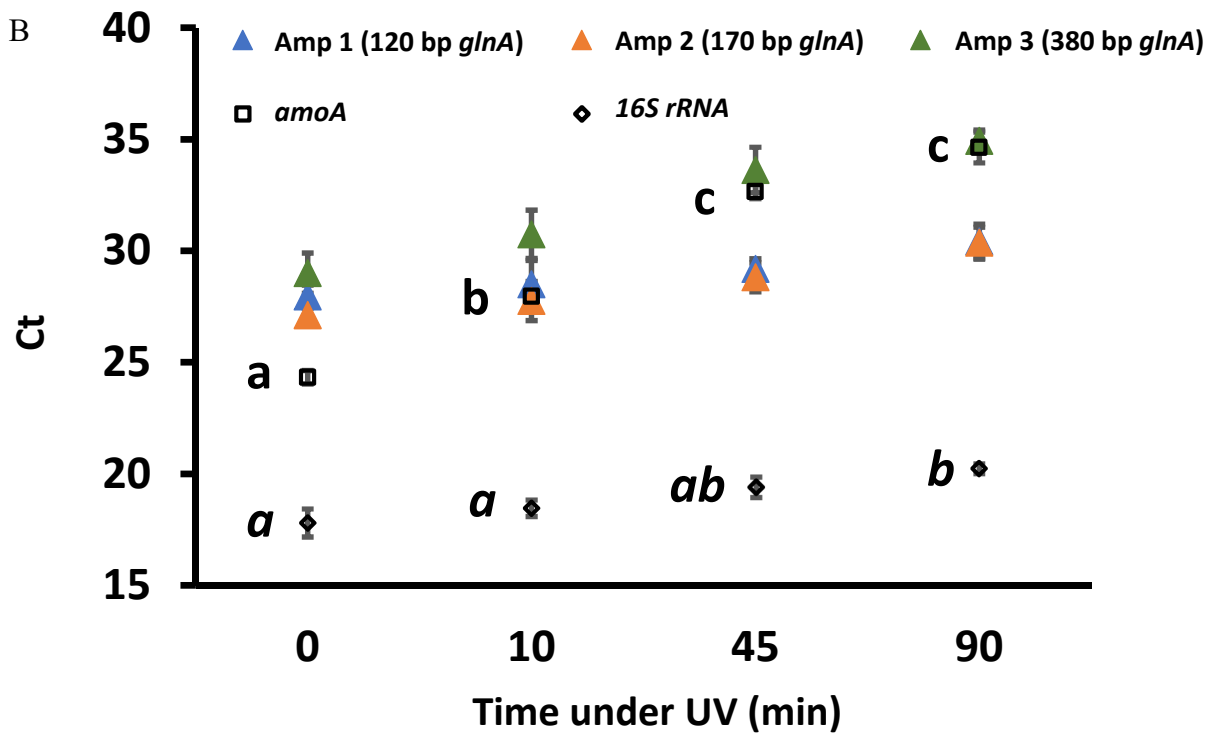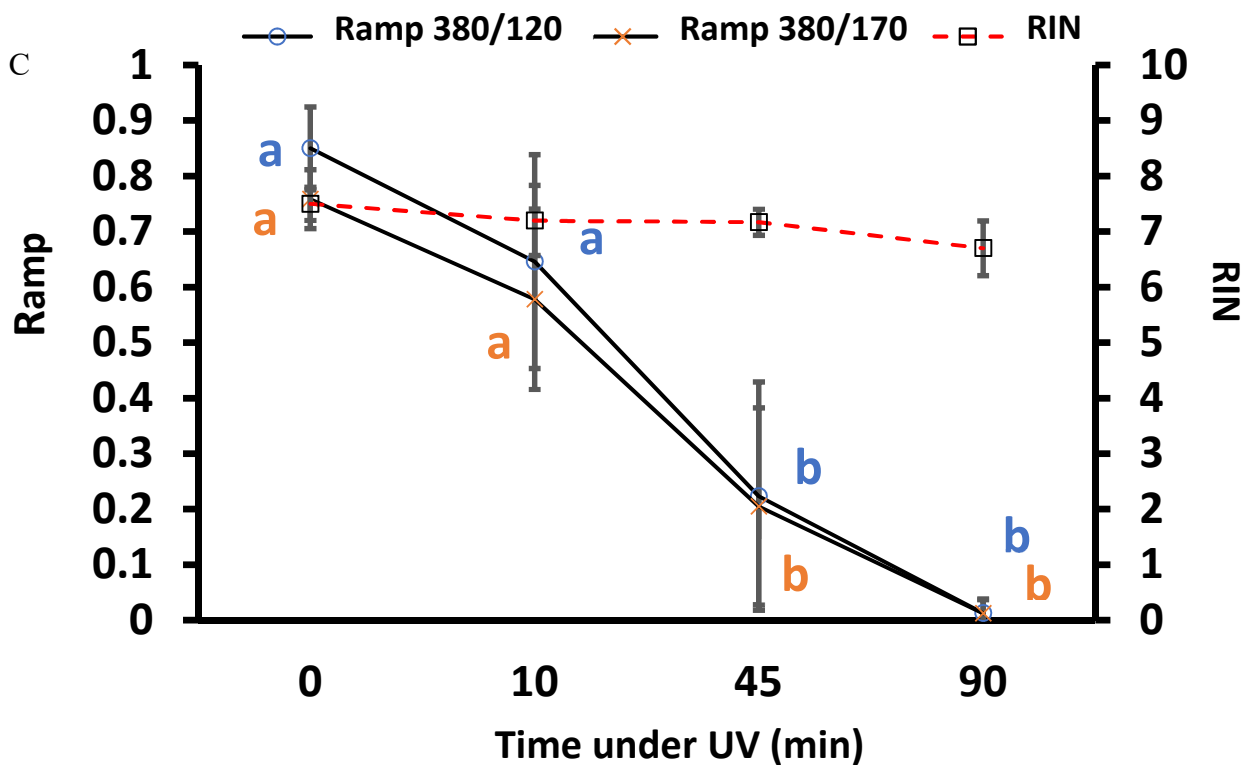

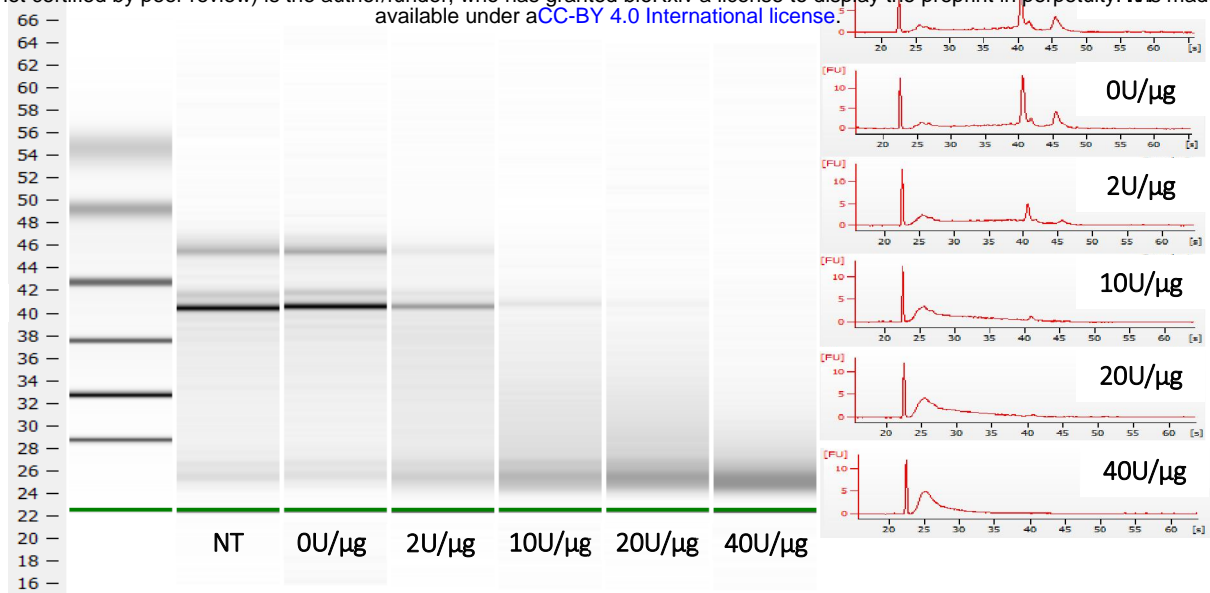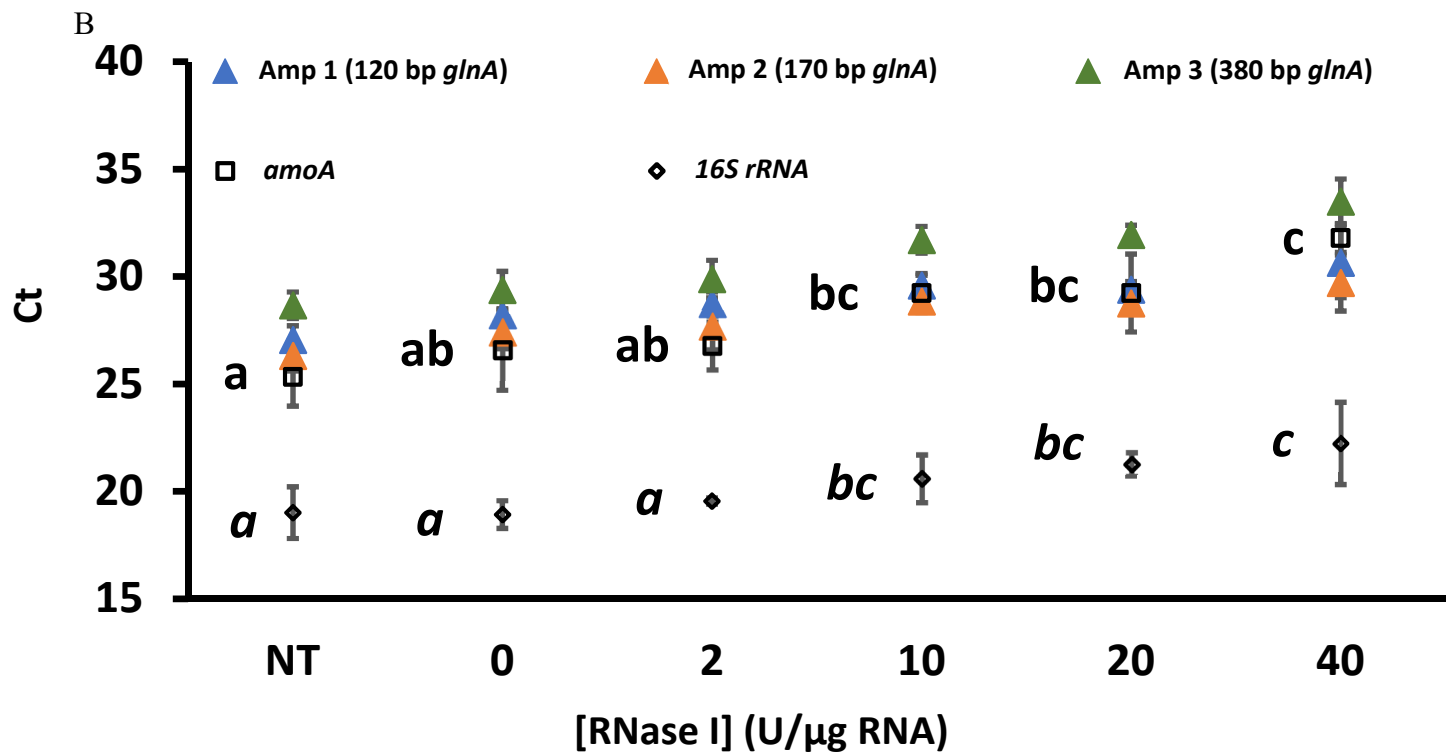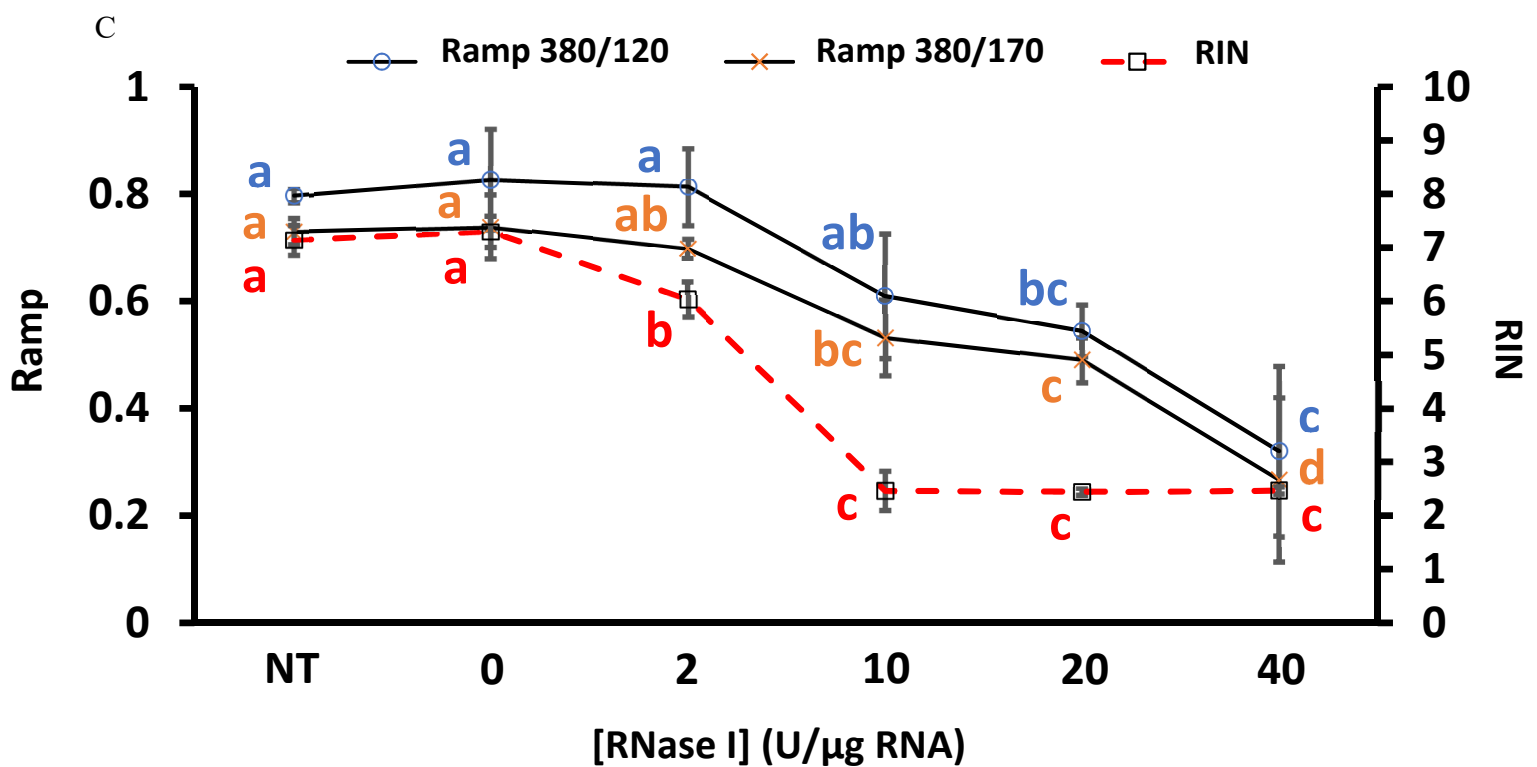

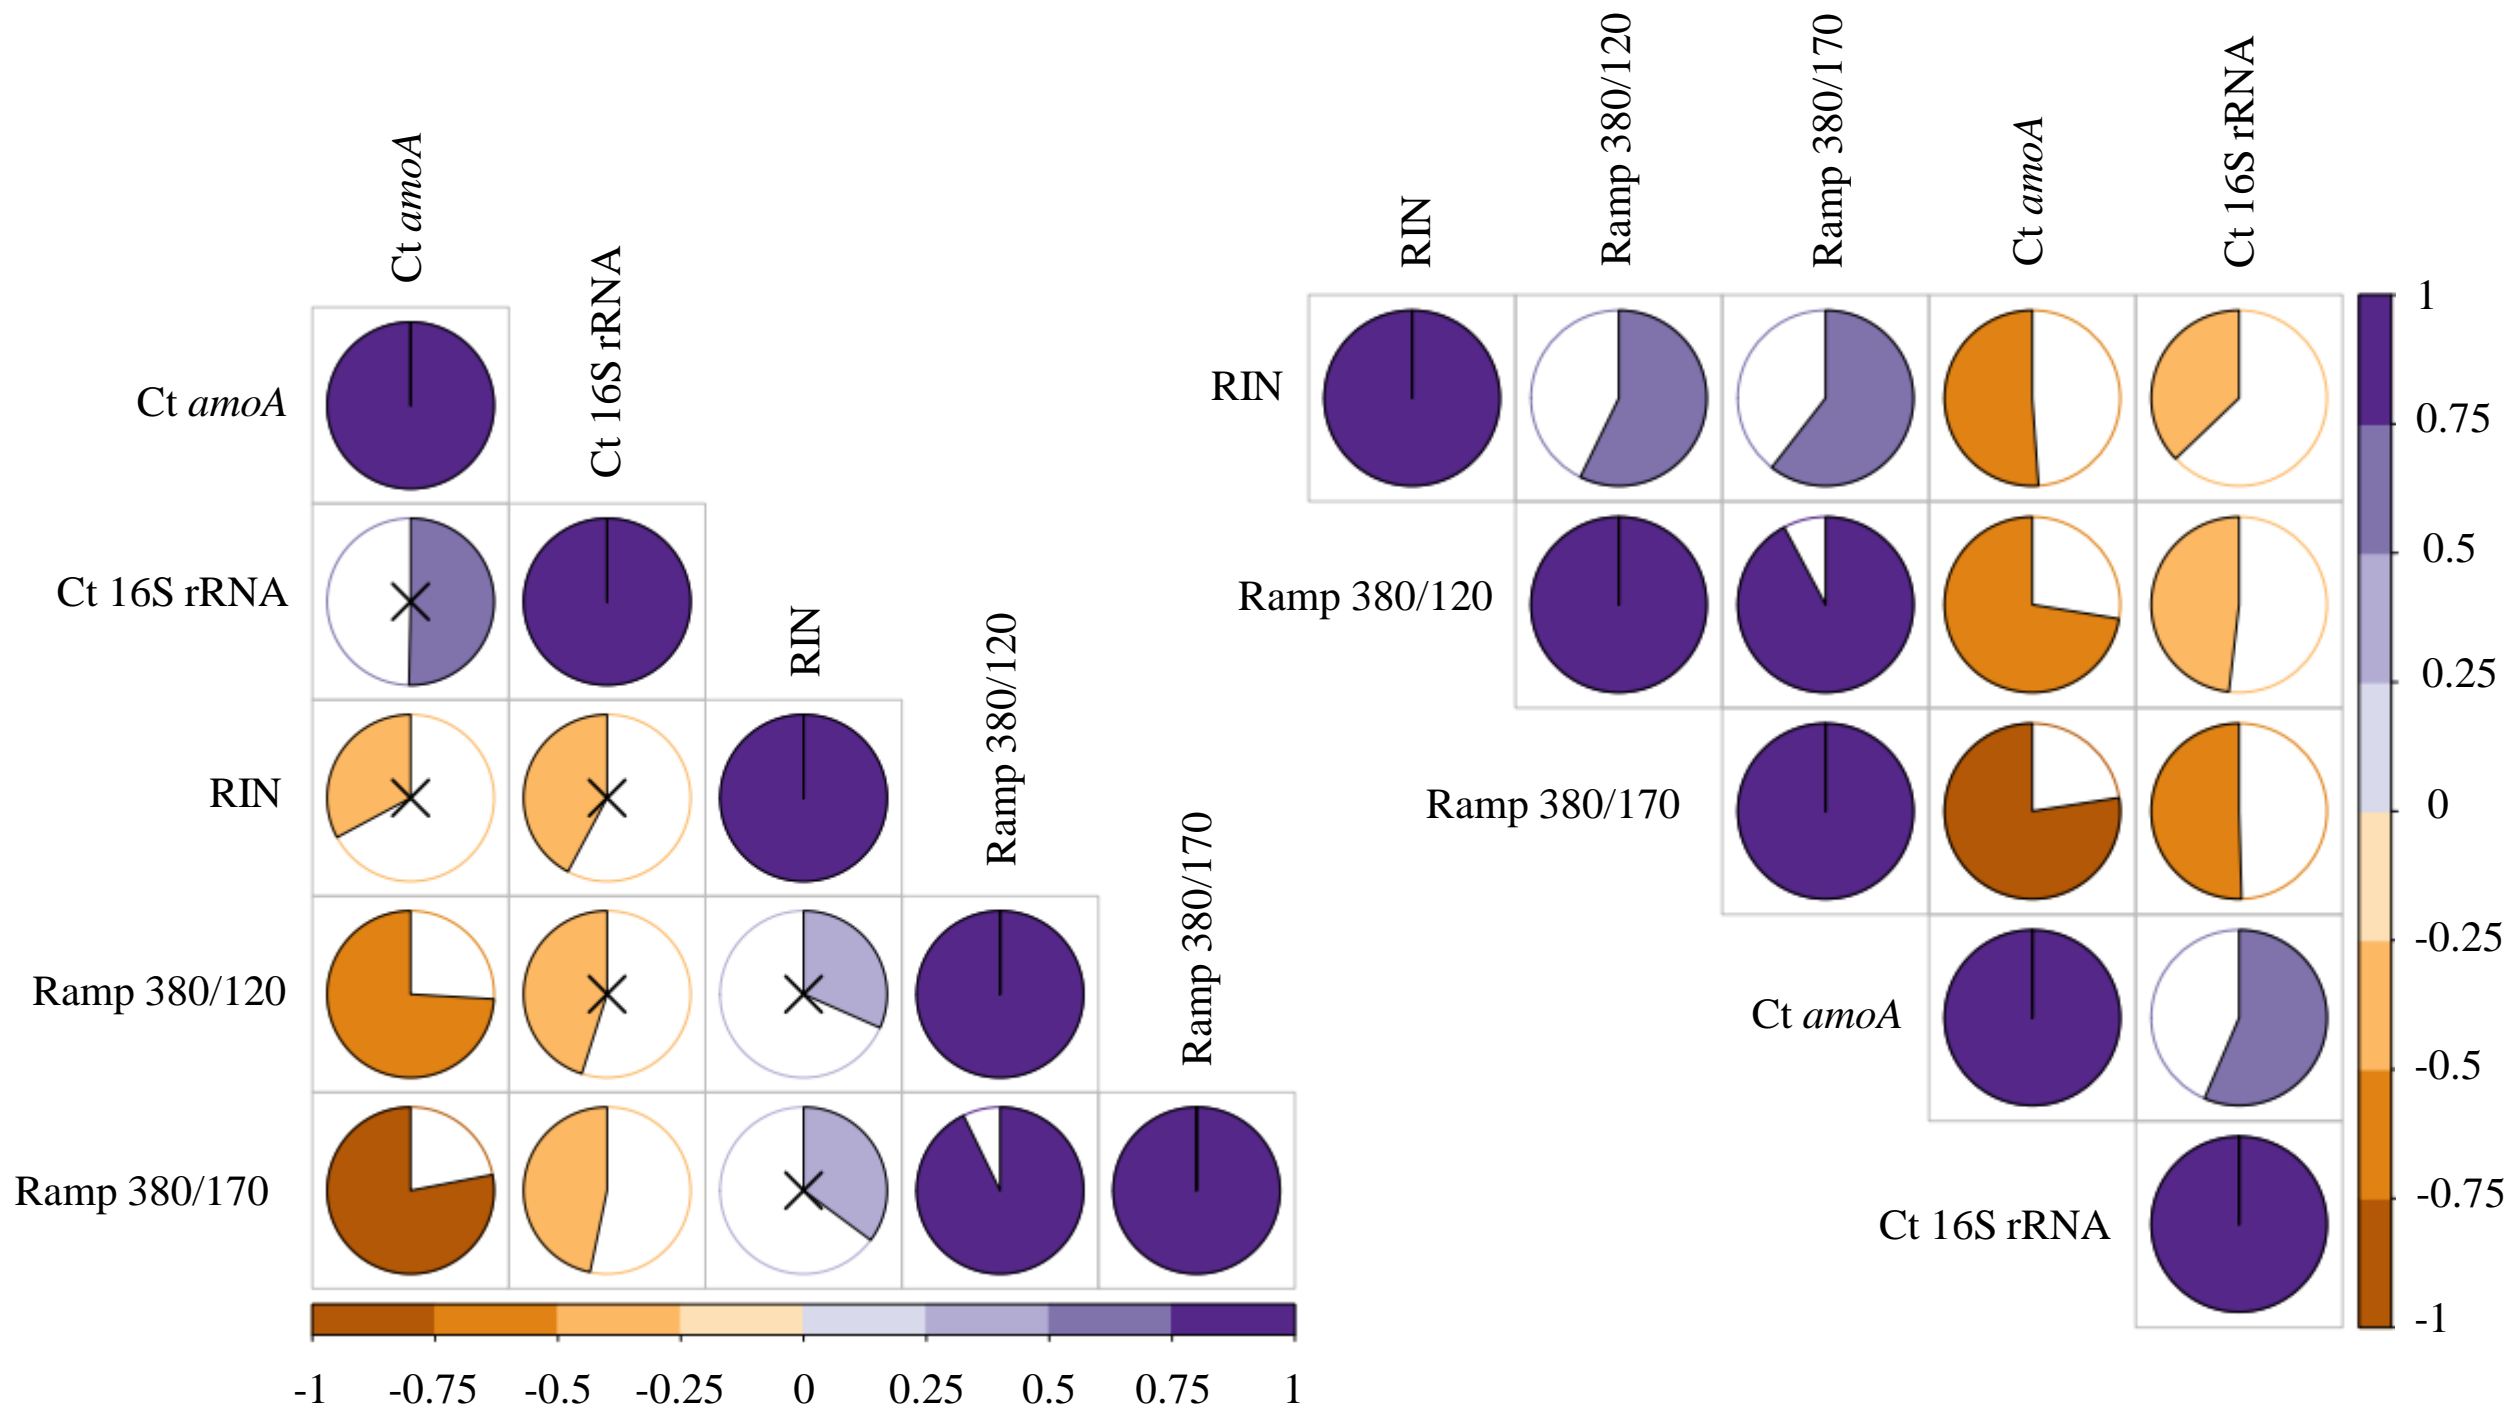

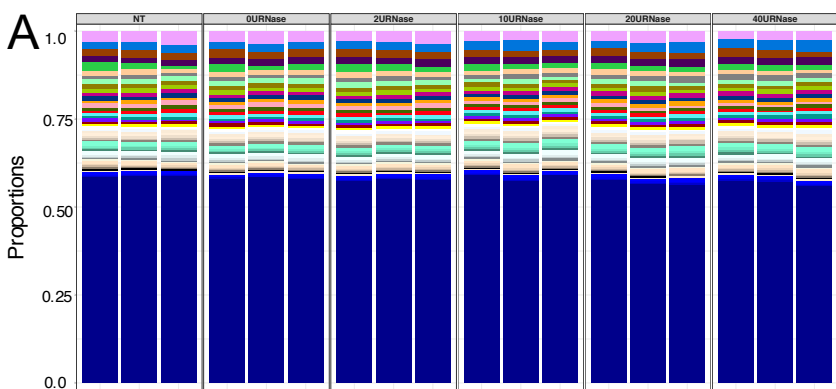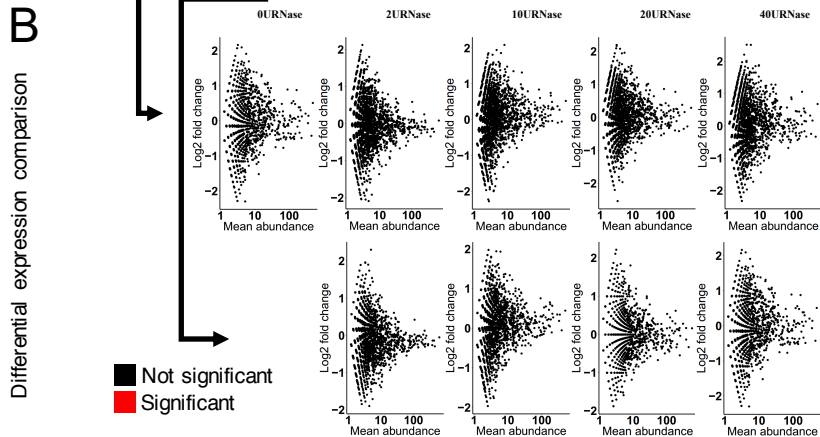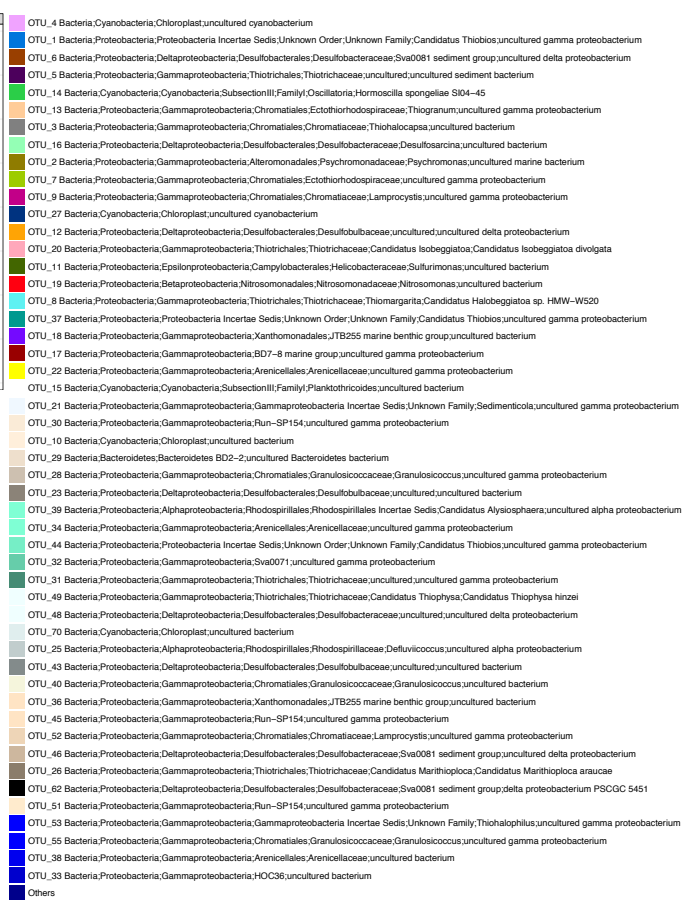



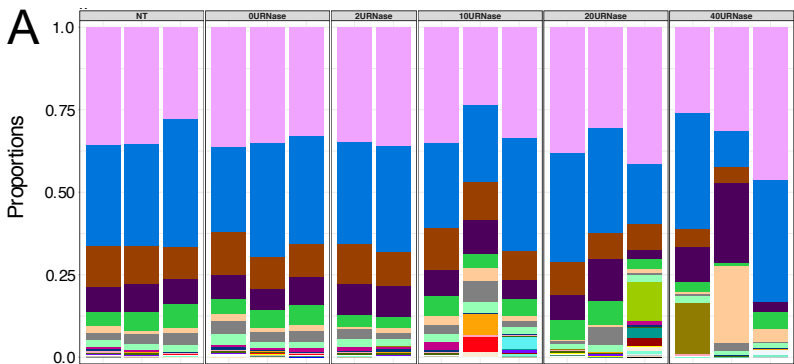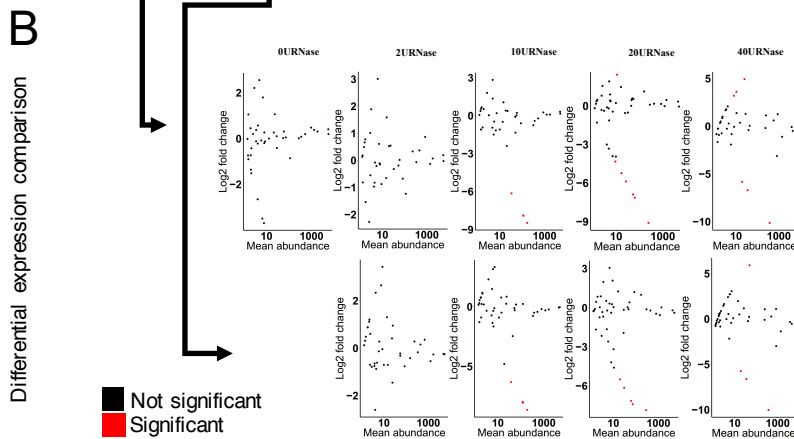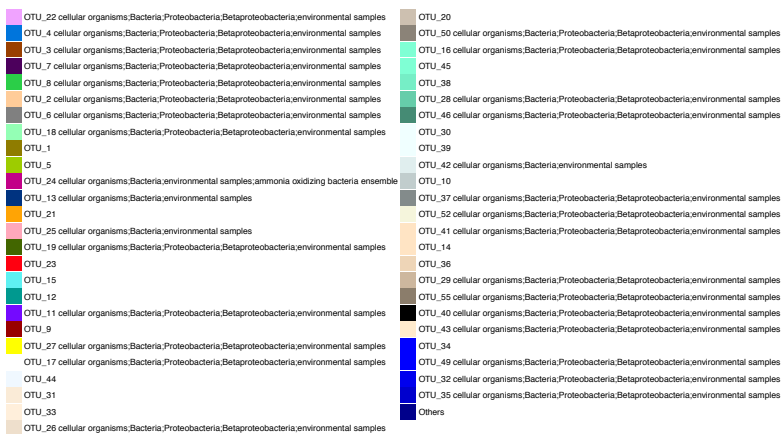

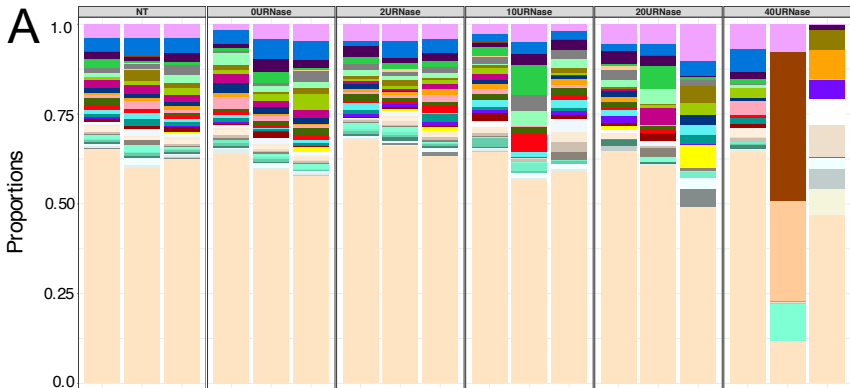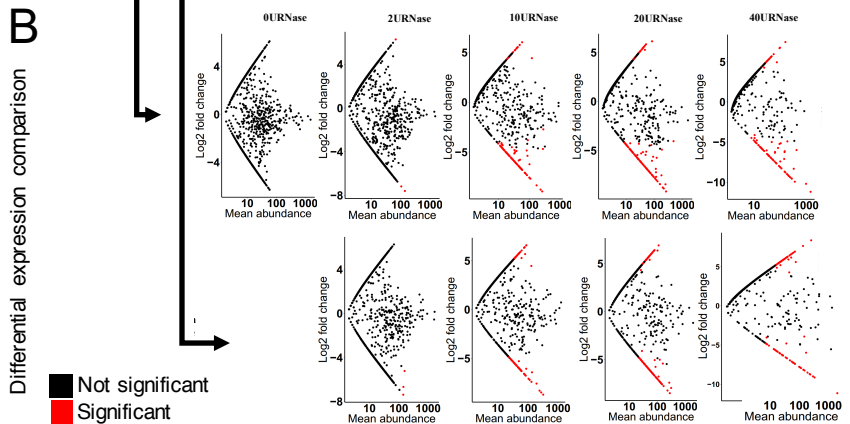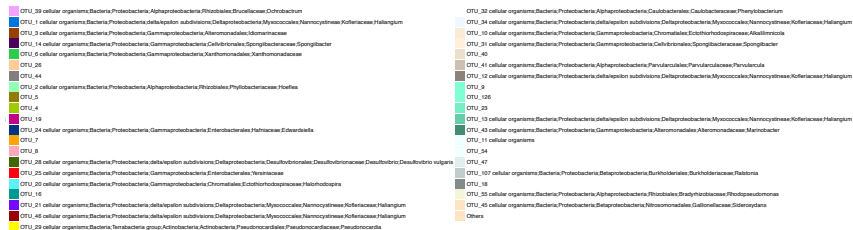

Source: https://www.biorxiv.org/content/10.1101/401109v1.full.pdf
